# Supplementary material for: Mechanisms of Cell Cycle Control Revealed by a Systematic and Quantitative Overexpression Screen in S. cerevisiae
Source: PubMed Central journal article supplement (PMC2438615; doi:10.1371/journal.pgen.1000120), 2008-07-11

**Supplemental Figure 1: Flow cytometry histograms of 108 ORF overexpression strains causing cell cycle defects upon induction.** Fluorescence intensity (DNA content) is indicated on the x-axis; the number of cells with a given intensity is plotted on the y-axis. G1-arresting cells are presented first, followed by G2/M & controls.

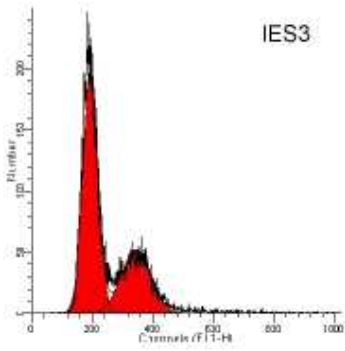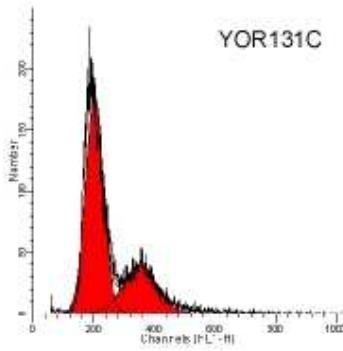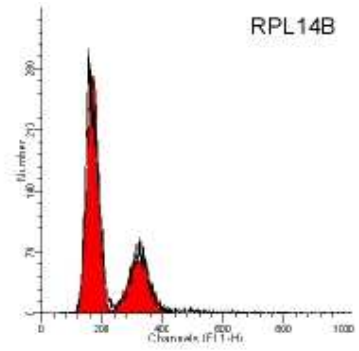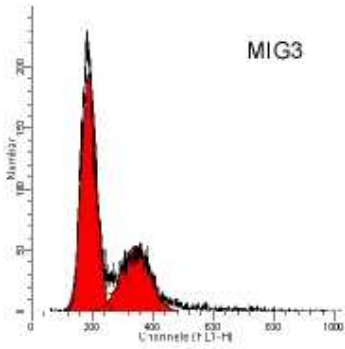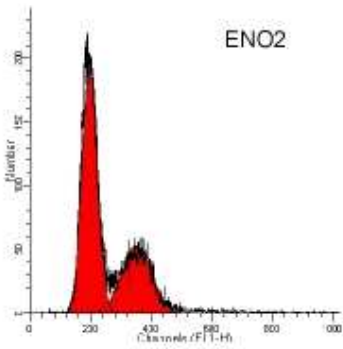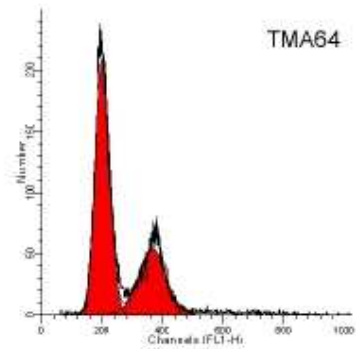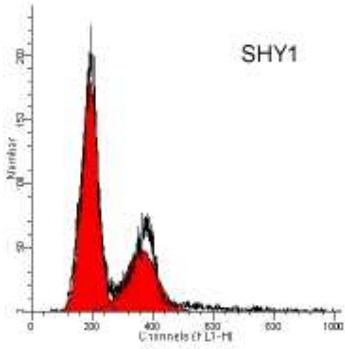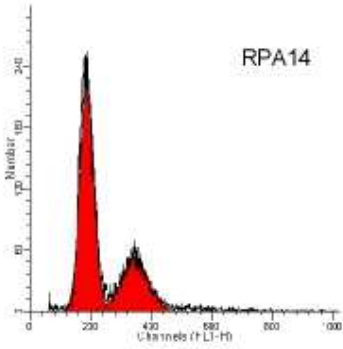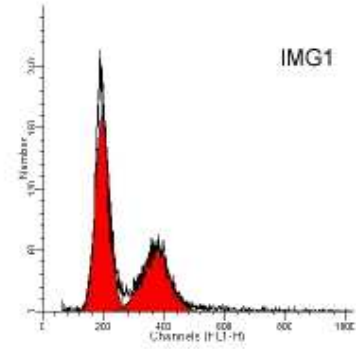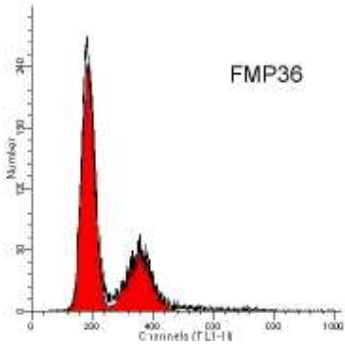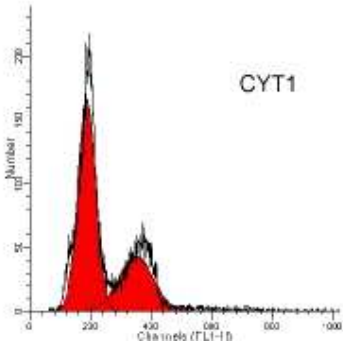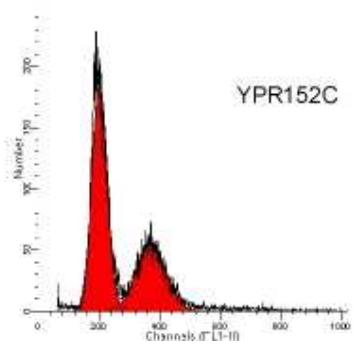

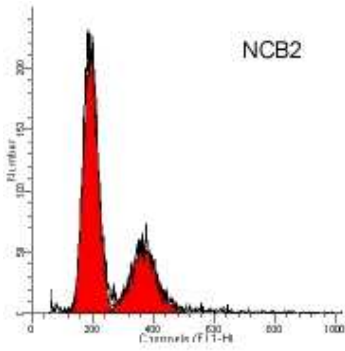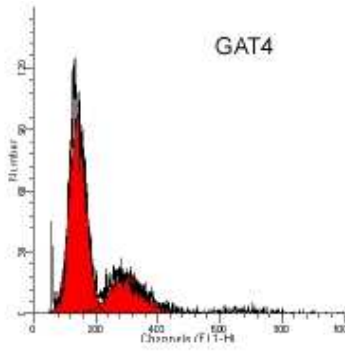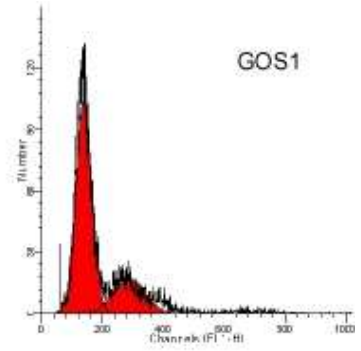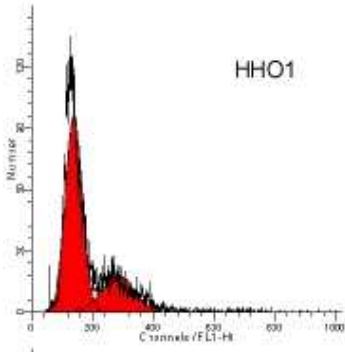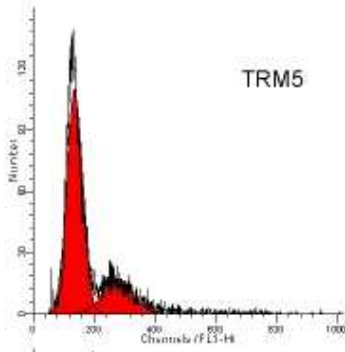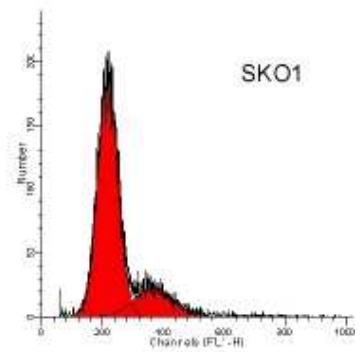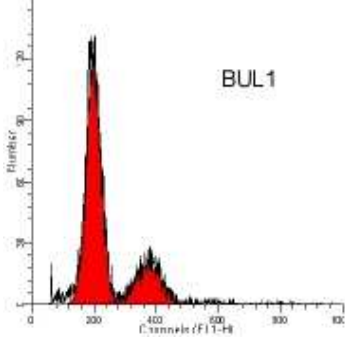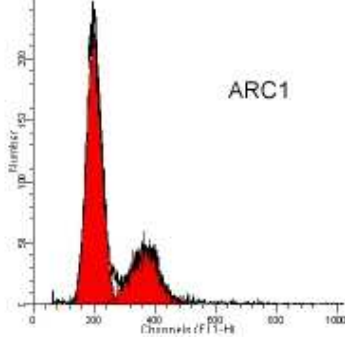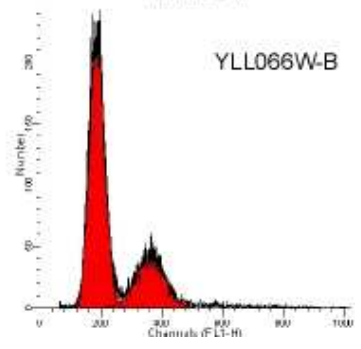

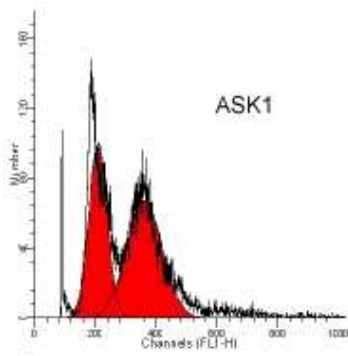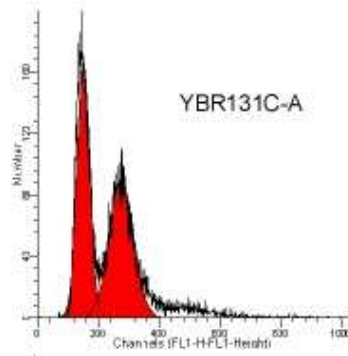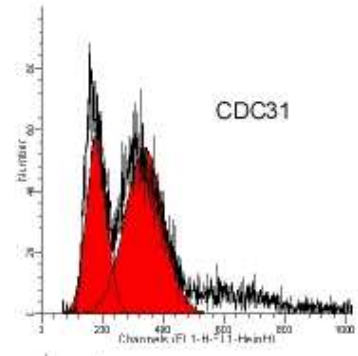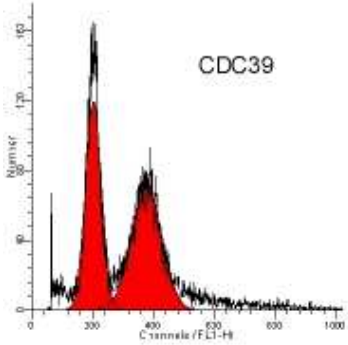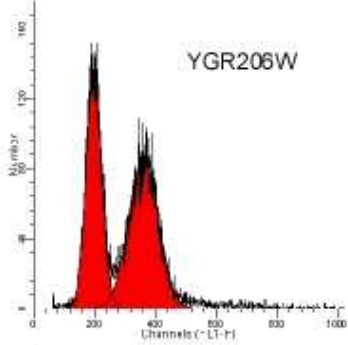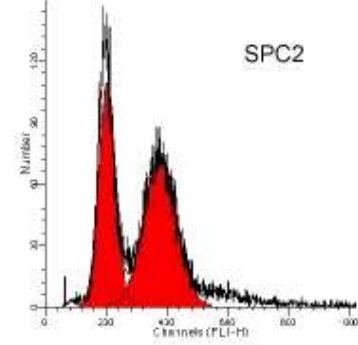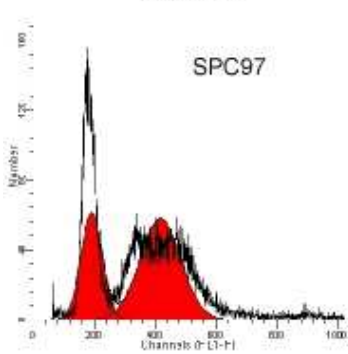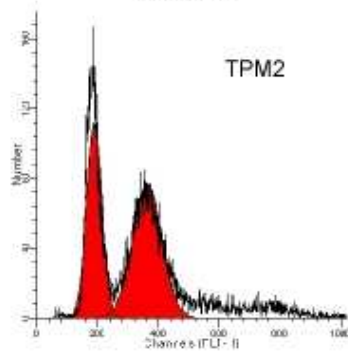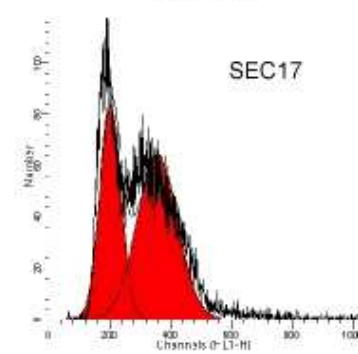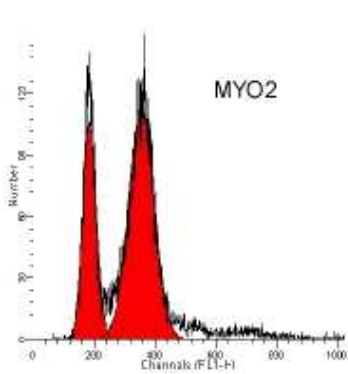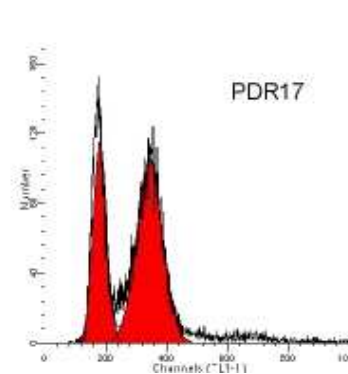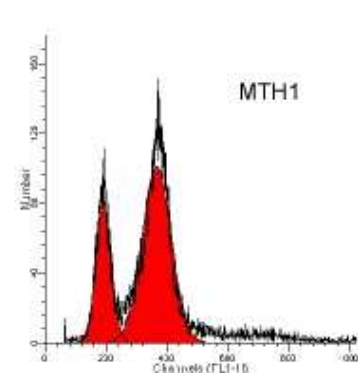

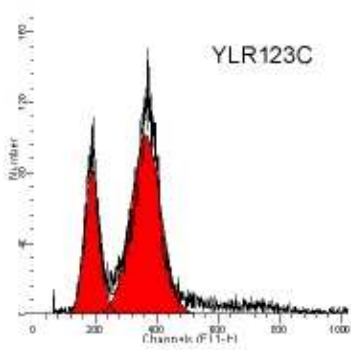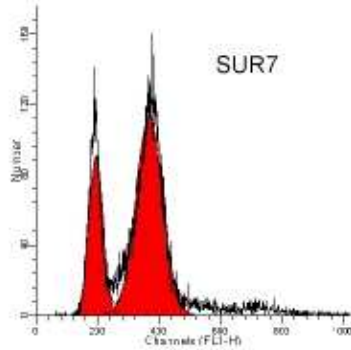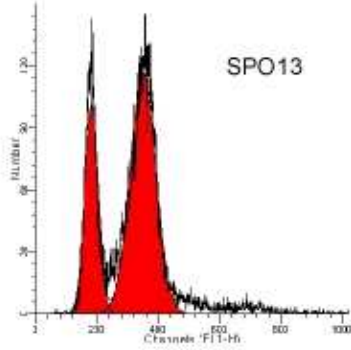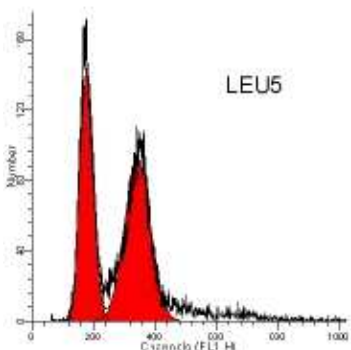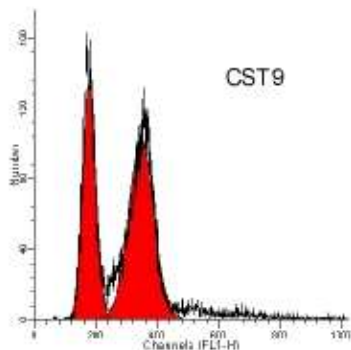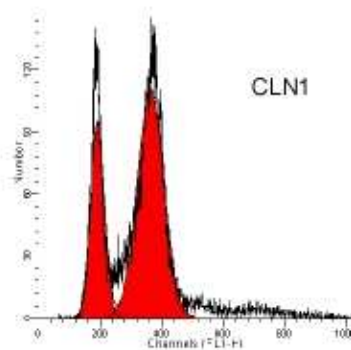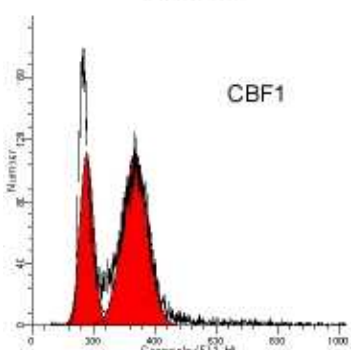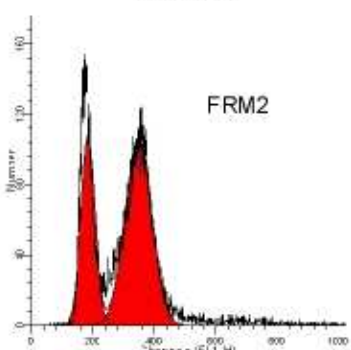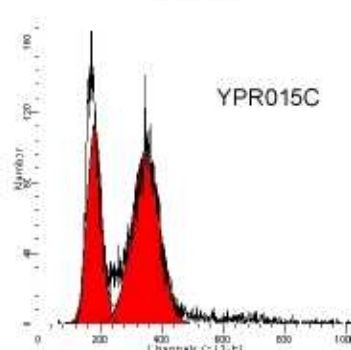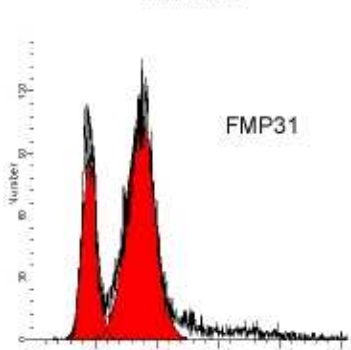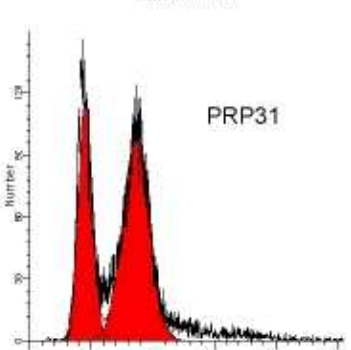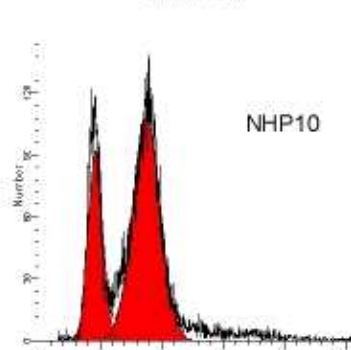

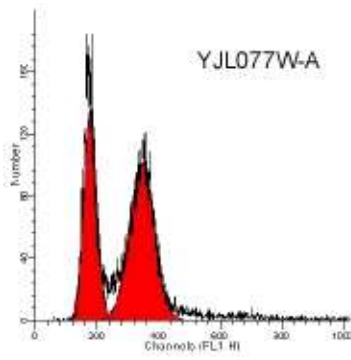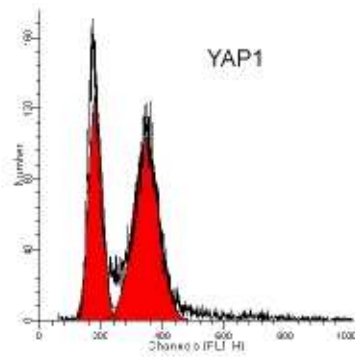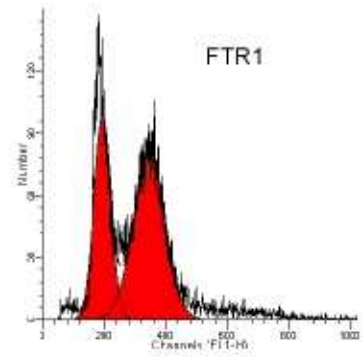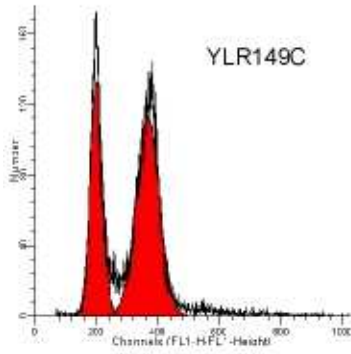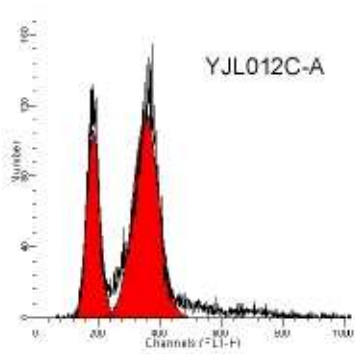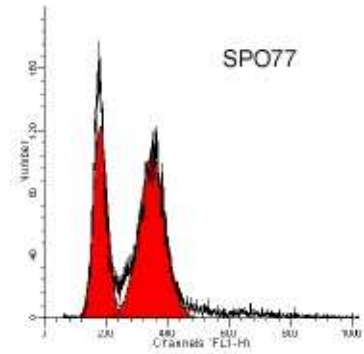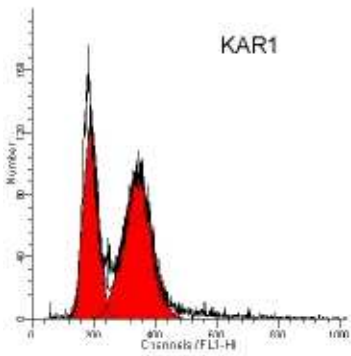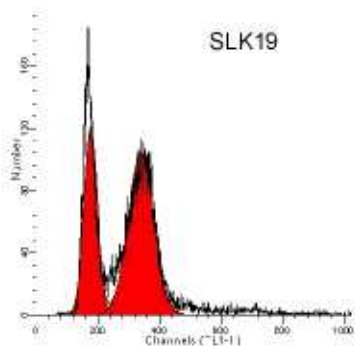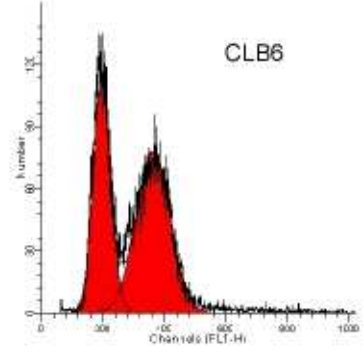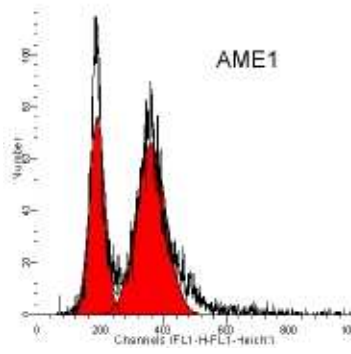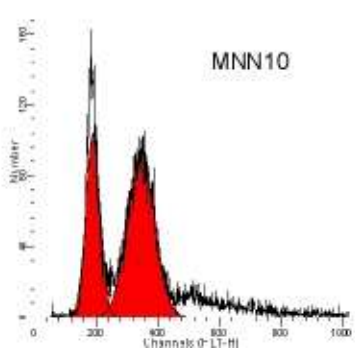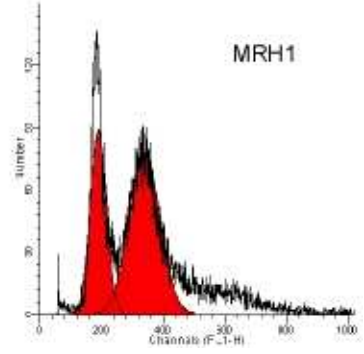

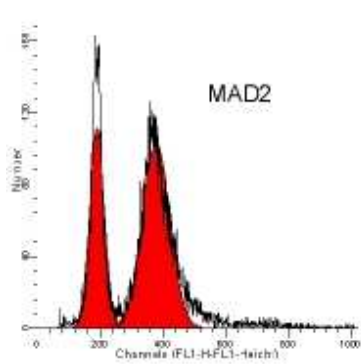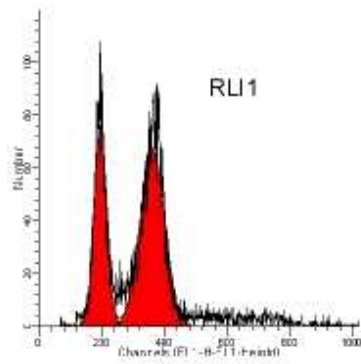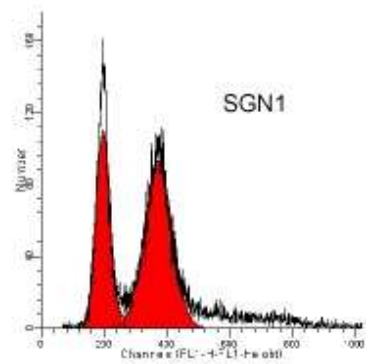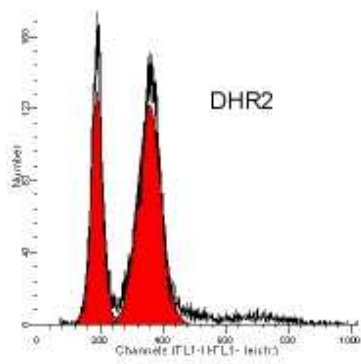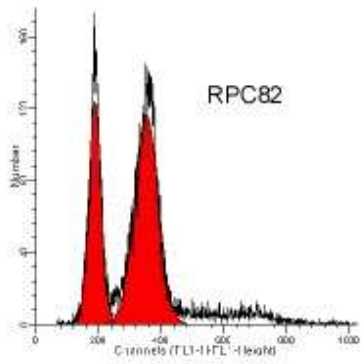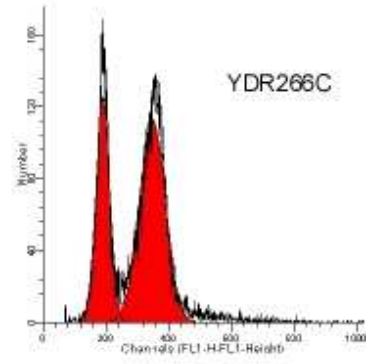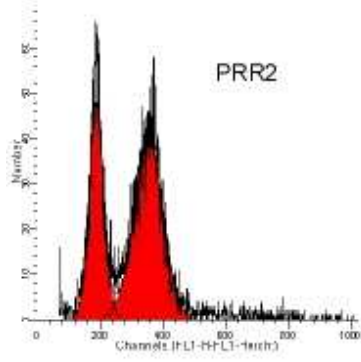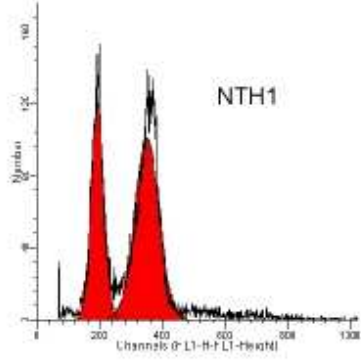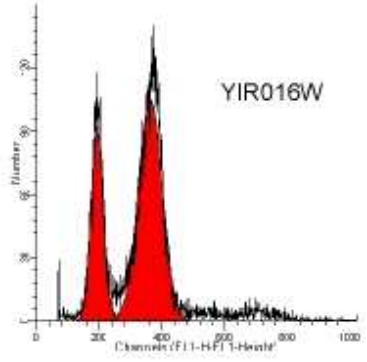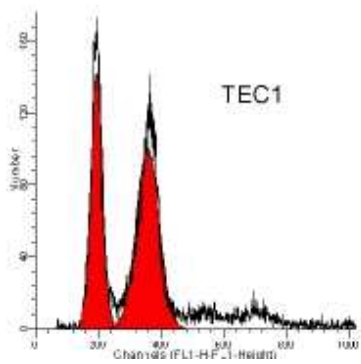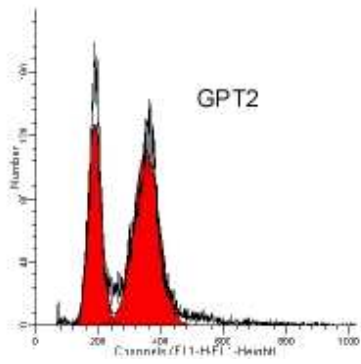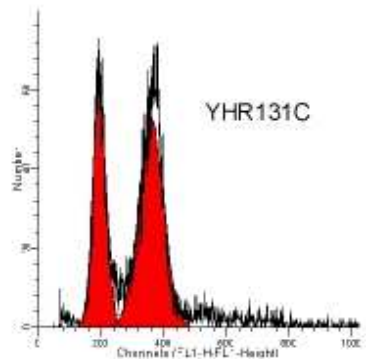

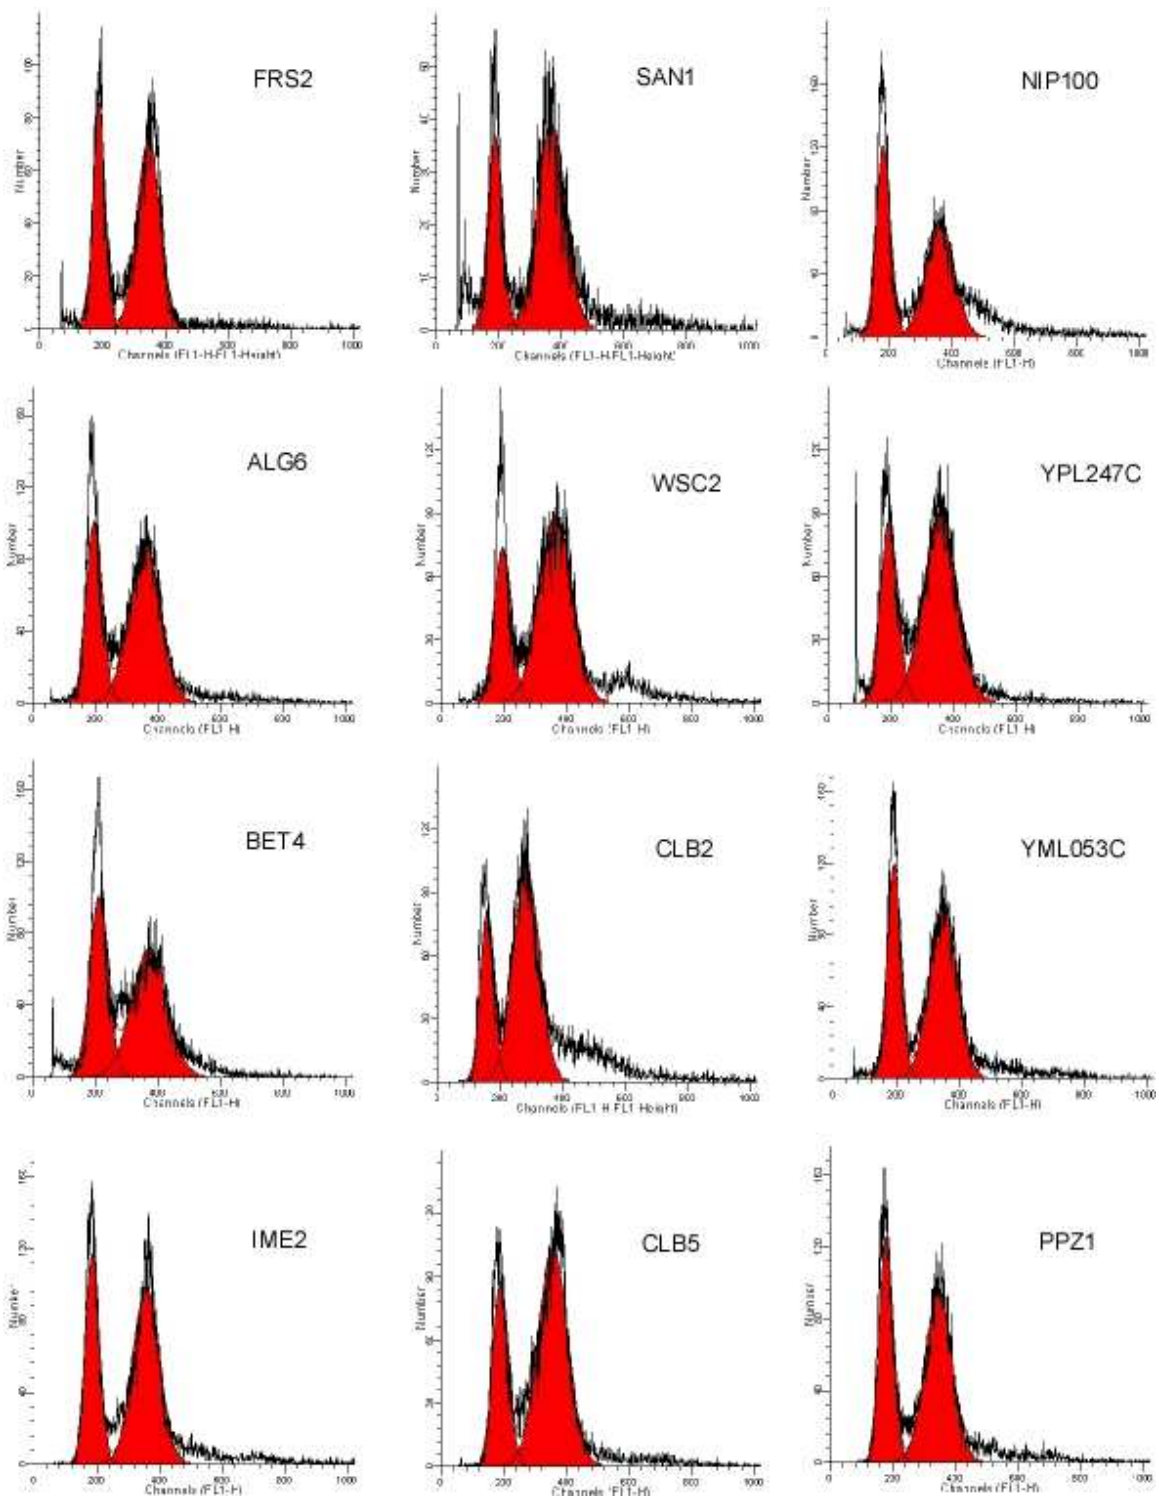



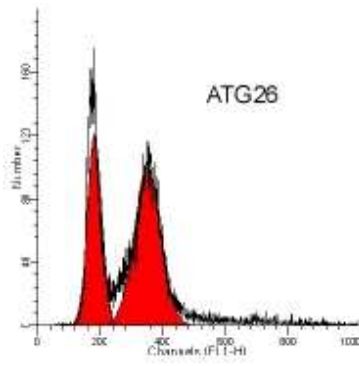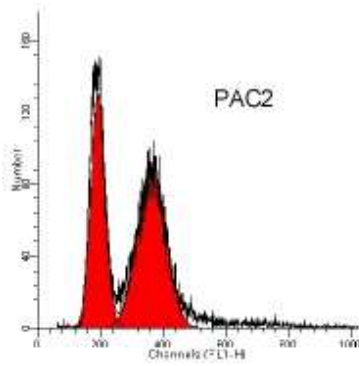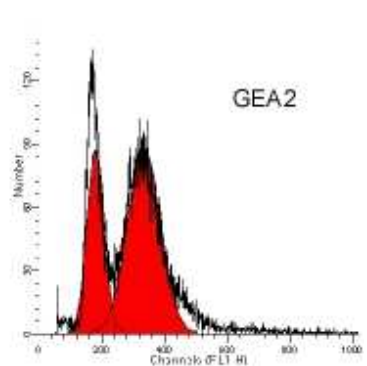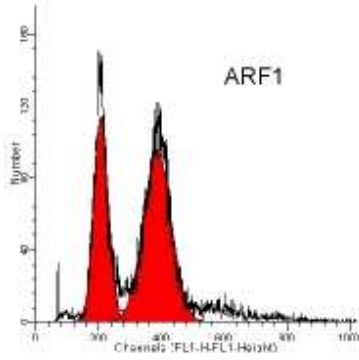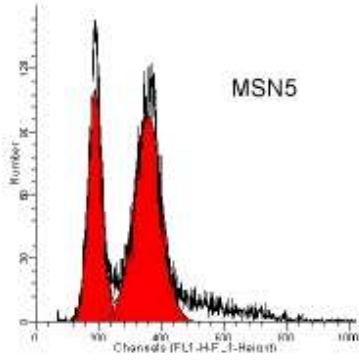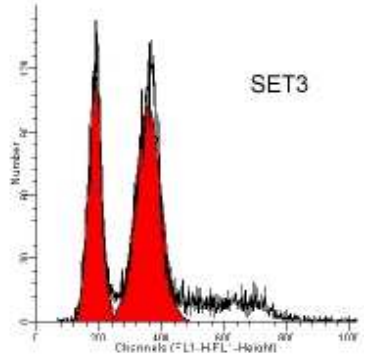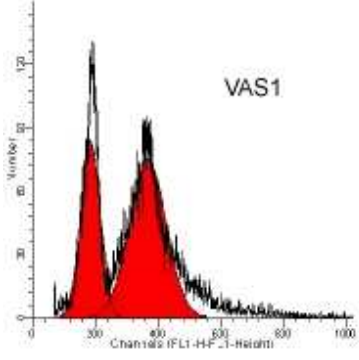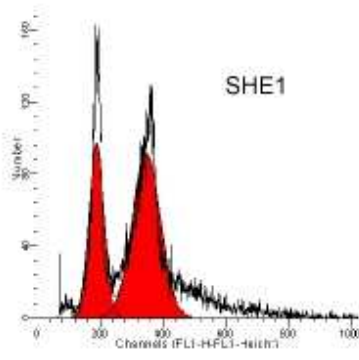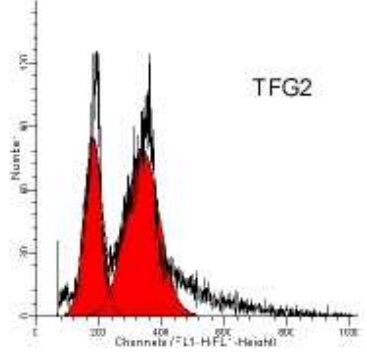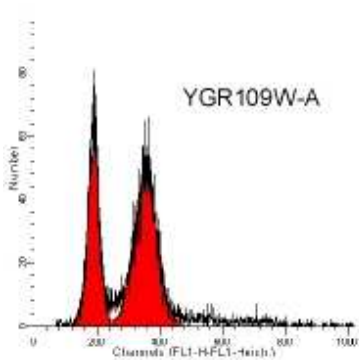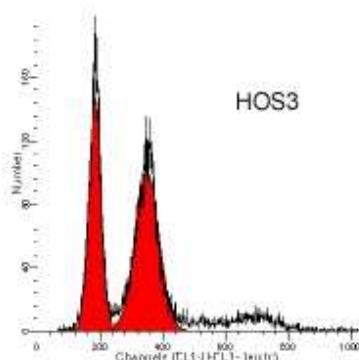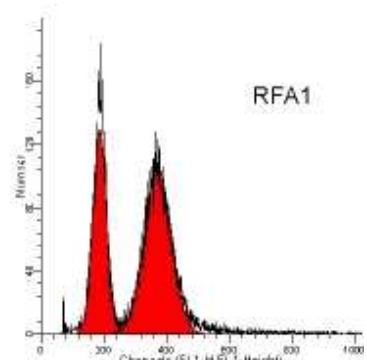

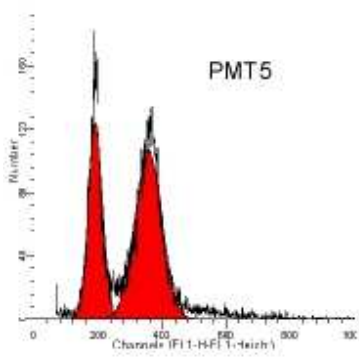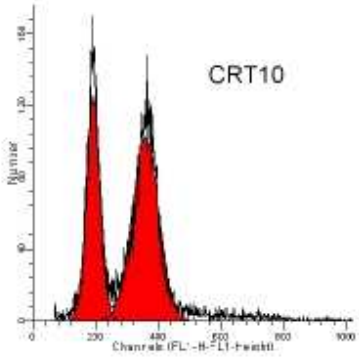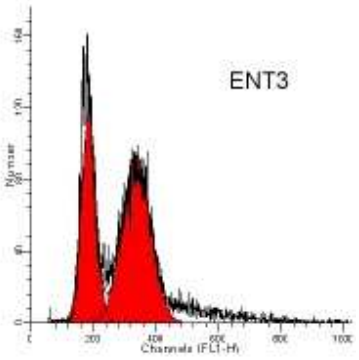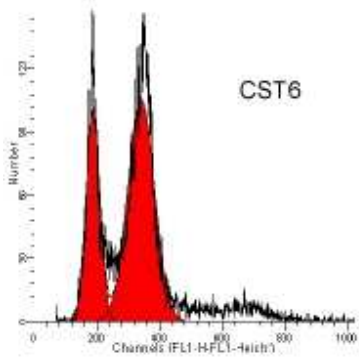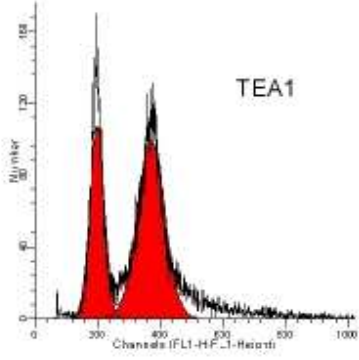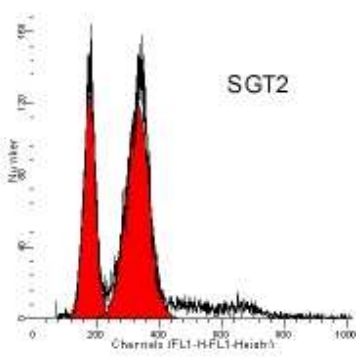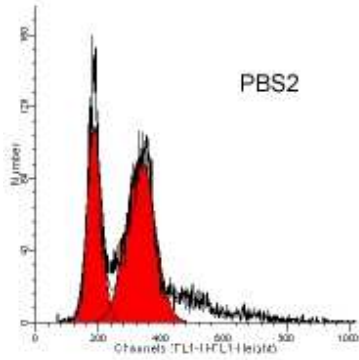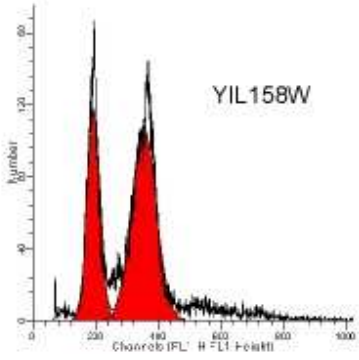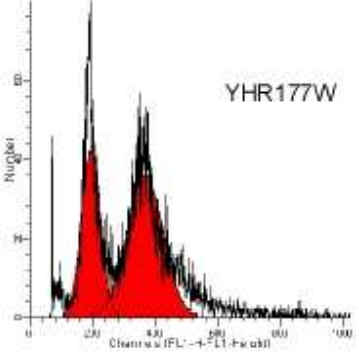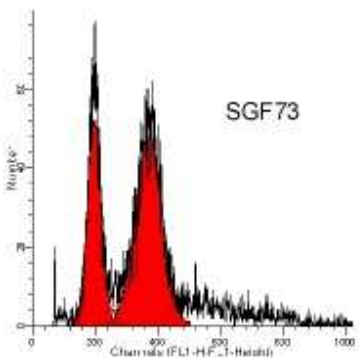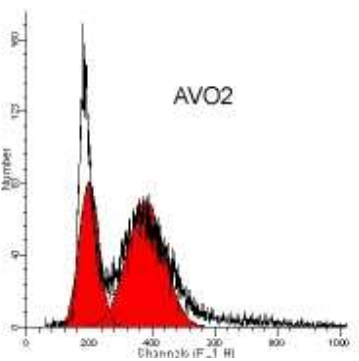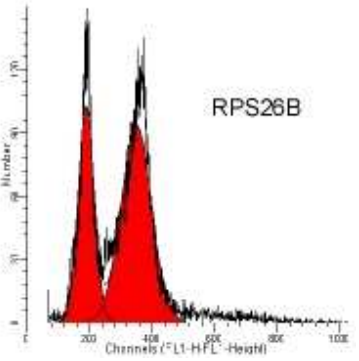

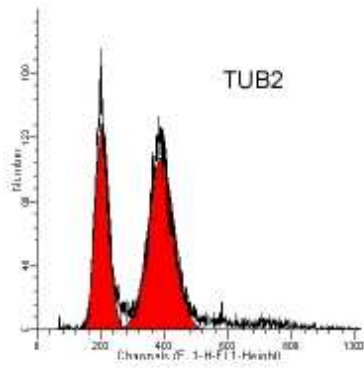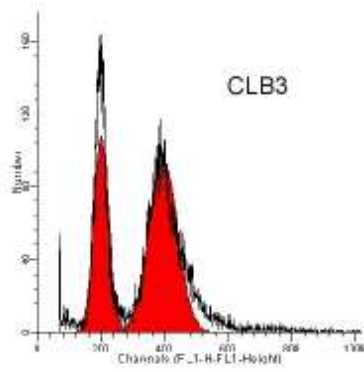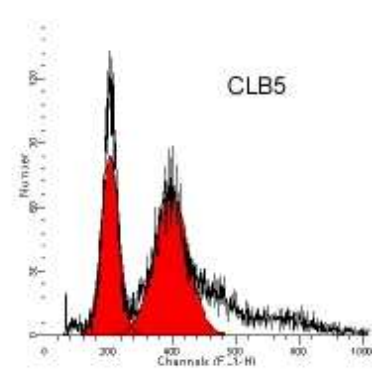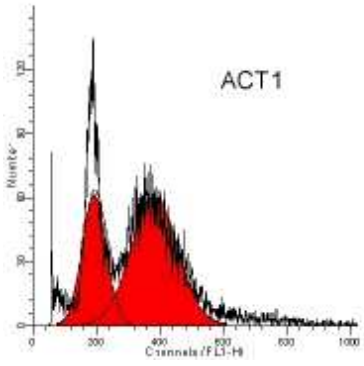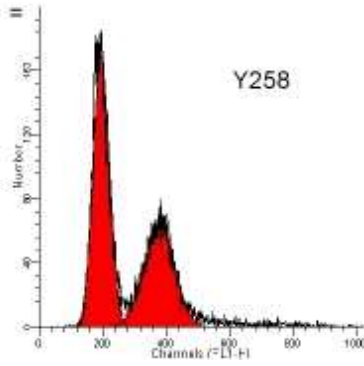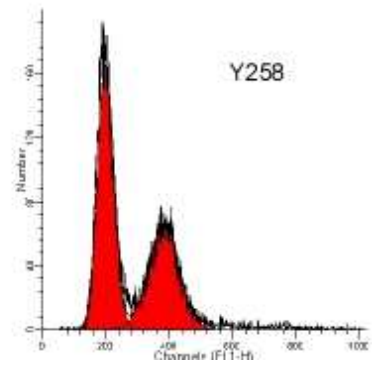

Supplement: pgen.1000120.s001.pdf [file pgen.1000120.s001.pdf]
