# Supplementary material for: Mechanisms of Cell Cycle Control Revealed by a Systematic and Quantitative Overexpression Screen in S. cerevisiae
Source: PLoS Genet. 2008 Jul 11;4(7):e1000120. doi: 10.1371/journal.pgen.1000120 (PMC2438615; doi:10.1371/journal.pgen.1000120)

**Supplemental Figure 4: Overlap of identified genes with previous large-scale studies.** A Venn diagram illustrates the intersection of genes identified in this study as delaying cell cycle progression when overexpressed with those genes identified by Sopko *et al.* [1] and Stevenson *et al.* [2]. The intersection is statistically significant ( $p < 0.05$ , hypergeometric probability), but small, likely due to differences in the screens themselves (e.g., selecting genes for analysis based on overexpressing-induced growth defects [1,2] versus comprehensive flow cytometry), in the overexpression strains used, and in the presence of epitope tags (e.g., such as by addition of protein A tags to the proteins analyzed in this work).

## References

1. Sopko R, Huang D, Preston N, Chua G, Papp B, et al. (2006) Mapping pathways and phenotypes by systematic gene overexpression. *Mol Cell* 21: 319-330.
2. Stevenson LF, Kennedy BK, Harlow E (2001) A large-scale overexpression screen in *Saccharomyces cerevisiae* identifies previously uncharacterized cell cycle genes. *Proc Natl Acad Sci U S A* 98: 3946-3951.

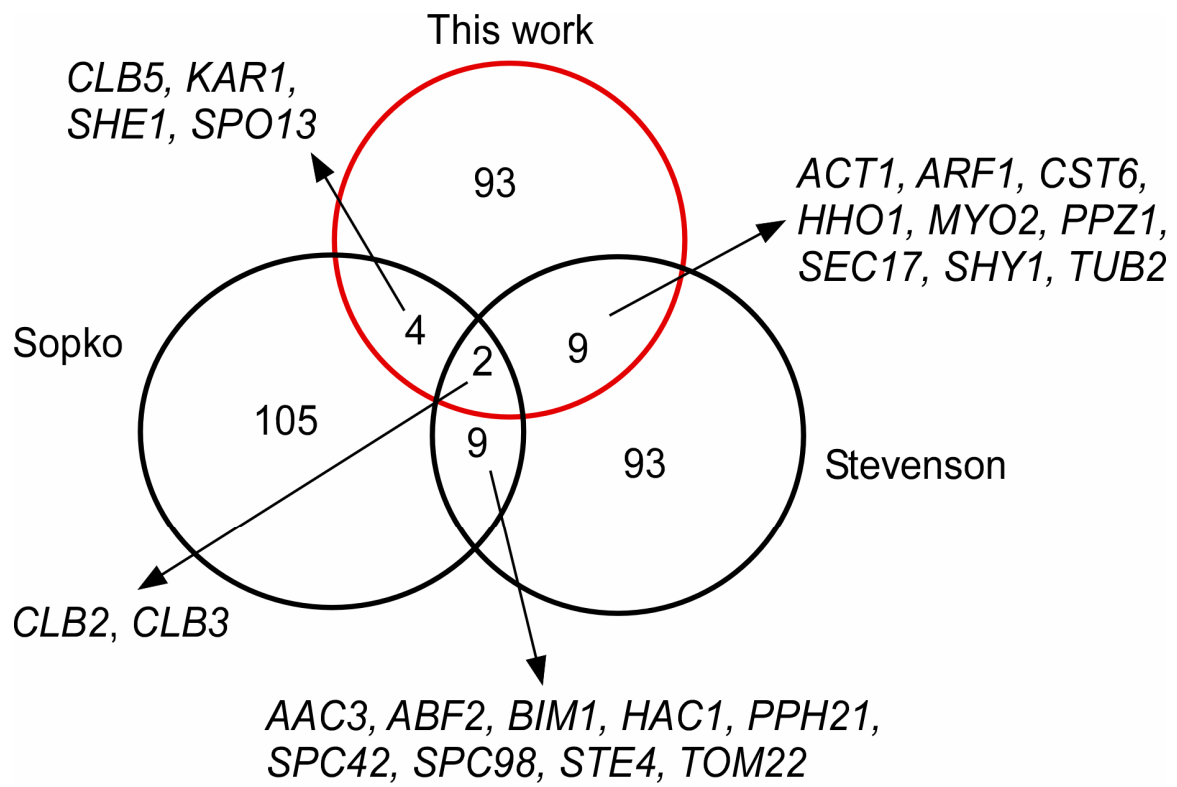

Supplement: Figure S4 — Overlap of identified genes with previous large-scale studies. (0.15 MB PDF) [file pgen.1000120.s004.pdf]
