# Supplementary material for: Mechanisms of Cell Cycle Control Revealed by a Systematic and Quantitative Overexpression Screen in S. cerevisiae
Source: PubMed Central journal article supplement (PMC2438615; doi:10.1371/journal.pgen.1000120), 2008-07-11

**Supplemental Figure 2:** 77 of the 82 ORF strains not previously known to show cell cycle defects upon induction were tested for drug sensitive growth phenotypes. Cells containing the control plasmid BG1766 and the indicated cell cycle genes from the screen were spotted onto SC-URA, 2% galactose plates or SC-URA, 2% galactose plates containing 50 $\mu$ M hydroxyurea (HU) or 15 $\mu$ g/ml nocodazole (NOC), and photographed after growth at 30 °C as described in Materials and Methods.

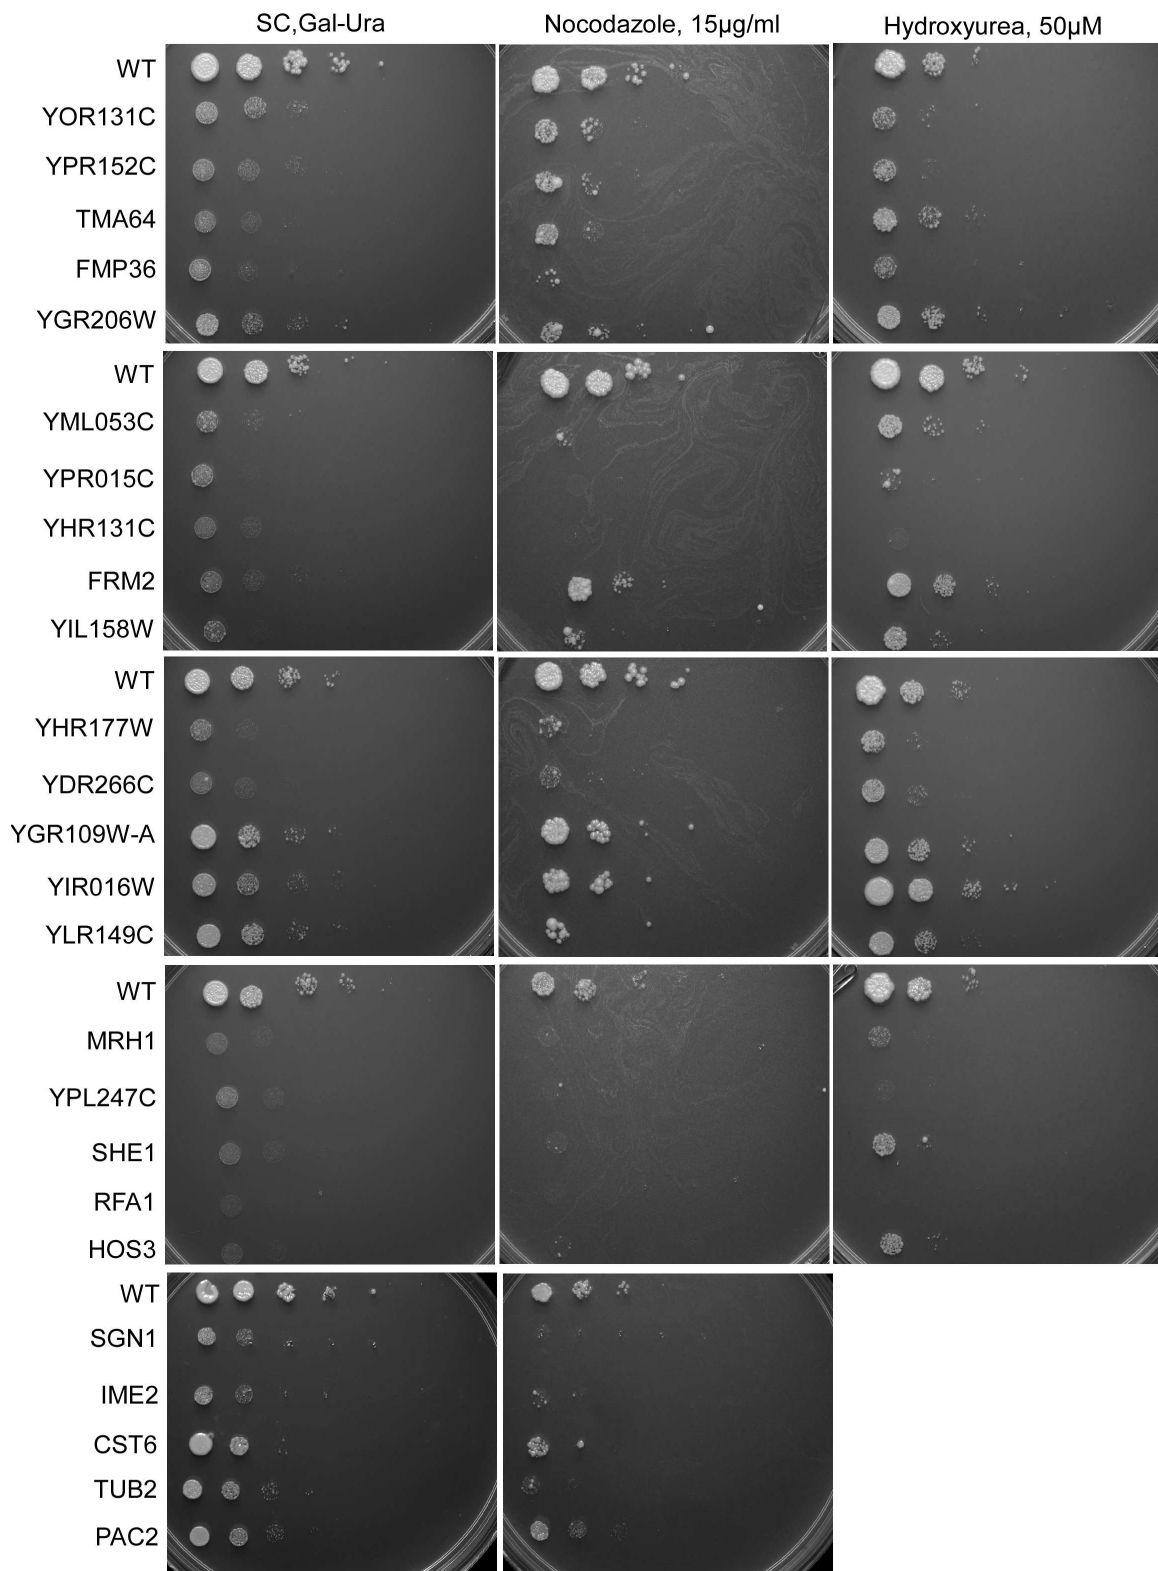

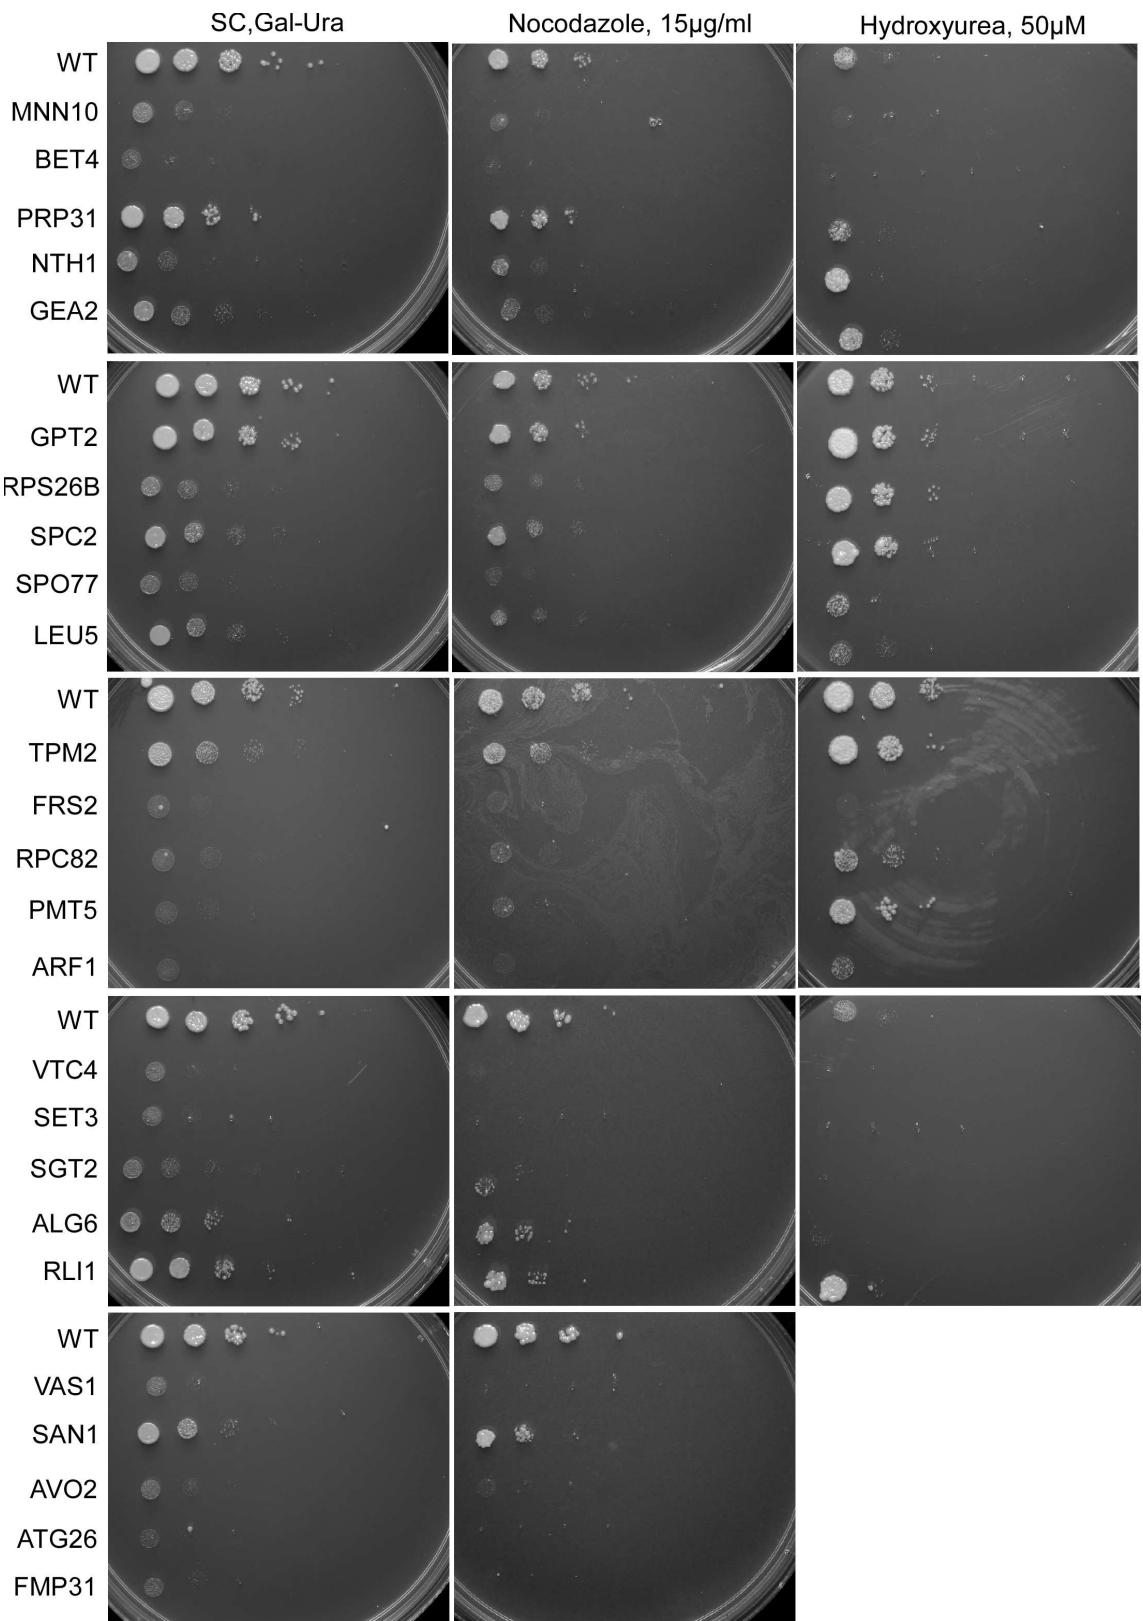

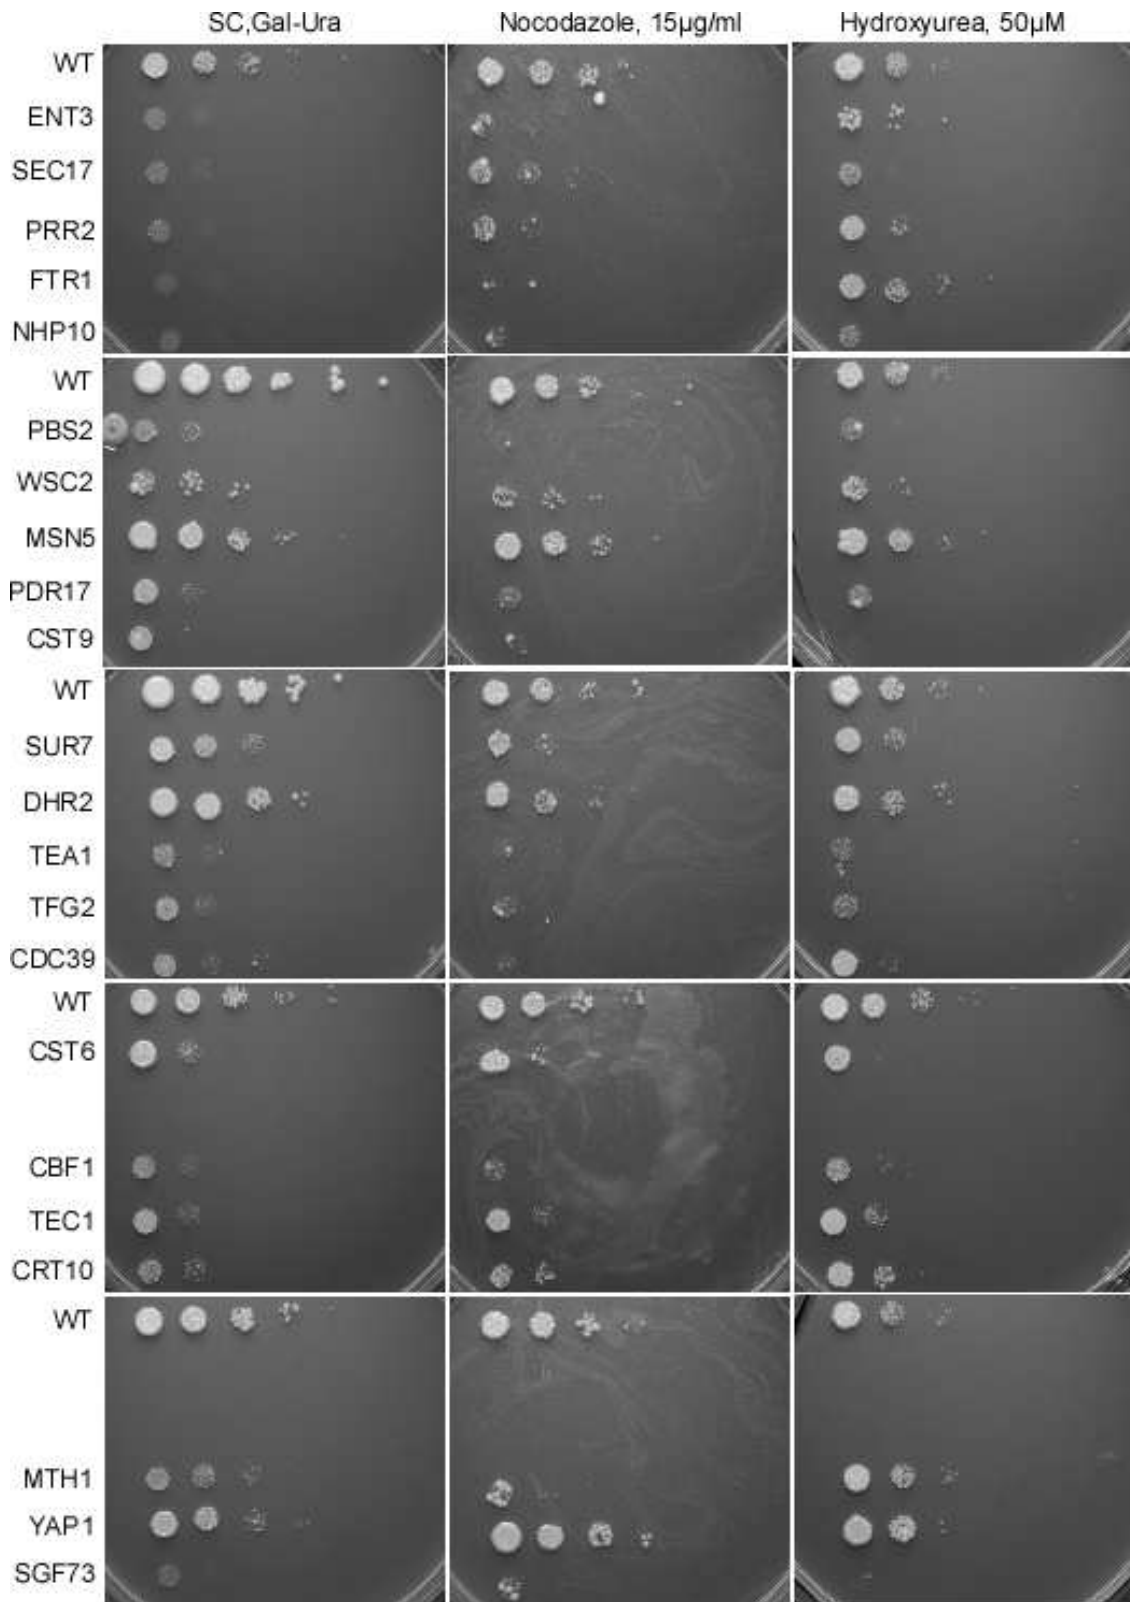

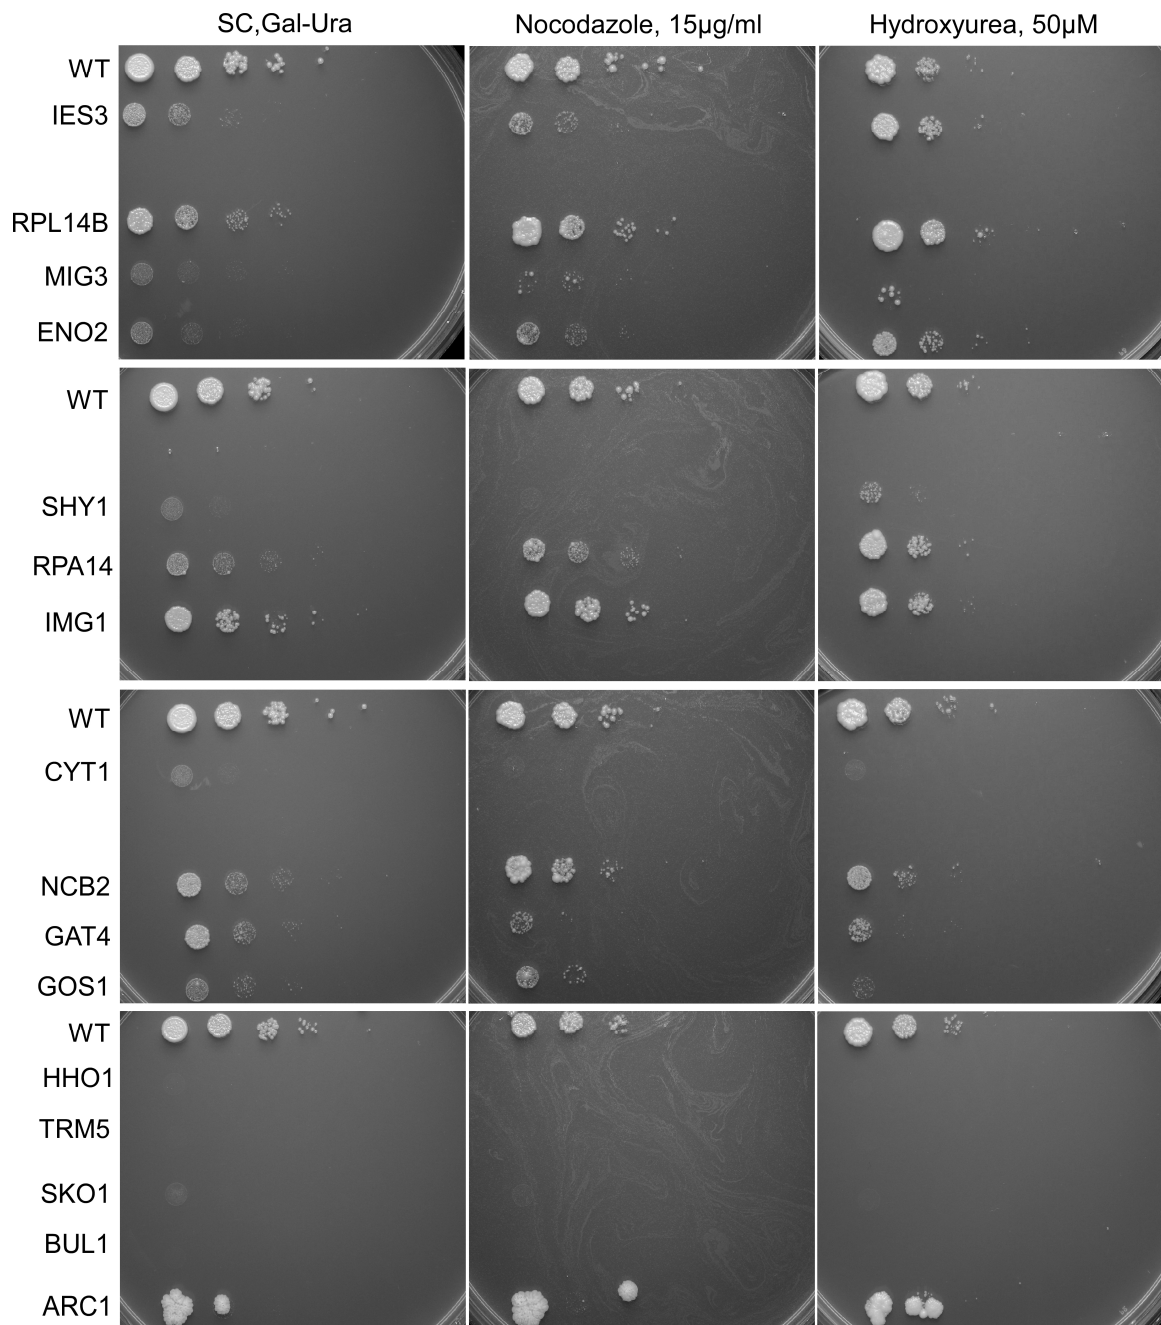

Supplement: pgen.1000120.s002.pdf [file pgen.1000120.s002.pdf]
