# Supplementary material for: Mechanisms of Cell Cycle Control Revealed by a Systematic and Quantitative Overexpression Screen in S. cerevisiae
Source: PubMed Central journal article supplement (PMC2438615; doi:10.1371/journal.pgen.1000120), 2008-07-11
Supplement: pgen.1000120.s005.pdf [file pgen.1000120.s005.pdf]

### Supplemental Table 1: Yeast ORFs causing cell cycle defects when overexpressed

21 ORF strains in G1 category listed with corresponding measurements of bud size distributions. Numbers indicate percentages of cells with no bud, small bud, and large bud, based upon  $N \sim 100$  cells / strain. Bold: genes newly implicated in cell cycle progression; \* : dubious ORFs.

| Systematic name | Standard name | % unbudded cells | % small budded cells | % large budded cells |
|-----------------|---------------|------------------|----------------------|----------------------|
| YLR052W         | IES3          | 0.78             | 0.01                 | 0.21                 |
| YOR131C         | YOR131C       | 0.81             | 0.06                 | 0.13                 |
| YHL001W         | RPL14B        | 0.74             | 0.15                 | 0.11                 |
| YER028C         | MIG3          | 0.67             | 0.14                 | 0.2                  |
| YHR174W         | ENO2          | 0.74             | 0.13                 | 0.13                 |
| YDR117C         | TMA64         | 0.77             | 0.08                 | 0.15                 |
| YGR112W         | SHY1          | 0.74             | 0.06                 | 0.23                 |
| YDR156W         | RPA14         | 0.76             | 0.01                 | 0.23                 |
| YCR046C         | IMG1          | 0.72             | 0.08                 | 0.21                 |
| YDR493W         | YDR493W       | 0.79             | 0                    | 0.21                 |
| YOR065W         | CYT1          | 0.79             | 0                    | 0.21                 |
| YPR152C         | YPR152C       | 0.72             | 0.12                 | 0.16                 |
| YDR397C         | NCB2          | 0.8              | 0.07                 | 0.13                 |
| YIR013C         | GAT4          | 0.69             | 0.03                 | 0.28                 |
| YHL031C         | GOS1          | 0.77             | 0.02                 | 0.21                 |
| YPL127C         | HHO1          | Not included     | Not included         | Not included         |
| YHR070W         | TRM5          | 0.92             | 0.06                 | 0.02                 |
| YNL167C         | SKO1          | 0.91             | 0.05                 | 0.05                 |
| YMR275C         | BUL1          | 0.97             | 0                    | 0.03                 |
| YGL105W         | ARC1          | 0.81             | 0.08                 | 0.11                 |
| *YLL066W-B      | *YLL066W-B    | 0.73             | 0.09                 | 0.17                 |
| Empty vector    | Empty vector  | 0.57             | 0.15                 | 0.28                 |

87 ORF strains in G2 category are listed with the measurements of bud size and nuclear morphology. Numbers represent percentages of cells with no bud, small bud, and large bud, based on  $N \sim 100$  cells / strain, as well as percentages of large-budded cells in three categories of nuclear morphology, based on  $N \sim 50$  large-budded cells / strain. The three categories of nuclear morphology are:

Class I: an undivided nucleus in one cell body of large budded cell

Class II: an undivided nucleus in bud neck of large budded cell

Class III: divided nuclei separated into two cell bodies

**Bold:** genes newly implicated in cell cycle progression; \* : dubious ORFs.

| Systematic name   | Standard name     | % unbudded cells | % small budded cells | % large budded cells | % class I | % class II | % class III |
|-------------------|-------------------|------------------|----------------------|----------------------|-----------|------------|-------------|
| YKL052C           | ASK1              | 0.67             | 0.11                 | 0.21                 | 0.11      | 0.14       | 0.75        |
| <b>*YBR131C-A</b> | <b>*YBR131C-A</b> | 0.53             | 0.16                 | 0.31                 | 0.24      | 0.22       | 0.53        |
| YOR257W           | CDC31             | 0.59             | 0.13                 | 0.28                 | 0.18      | 0.13       | 0.69        |
| YCR093W           | CDC39             | 0.33             | 0.12                 | 0.55                 | 0.12      | 0.17       | 0.71        |
| <b>YGR206W</b>    | <b>YGR206W</b>    | 0.57             | 0.07                 | 0.37                 | 0.29      | 0.09       | 0.63        |
| <b>YML055W</b>    | <b>SPC2</b>       | 0.53             | 0.05                 | 0.42                 | 0.1       | 0.07       | 0.83        |
| YHR172W           | SPC97             | 0.33             | 0.05                 | 0.62                 | 0.14      | 0.77       | 0.09        |
| <b>YIL138C</b>    | <b>TPM2</b>       | 0.52             | 0.05                 | 0.43                 | 0.04      | 0.18       | 0.78        |
| YBL050W           | SEC17             | 0.52             | 0.11                 | 0.37                 | 0.13      | 0.26       | 0.61        |
| YOR326W           | MYO2              | 0.57             | 0.12                 | 0.31                 | 0.15      | 0.22       | 0.63        |
| <b>YNL264C</b>    | <b>PDR17</b>      | 0.38             | 0.11                 | 0.51                 | 0.13      | 0.27       | 0.6         |
| <b>YDR277C</b>    | <b>MTH1</b>       | 0.41             | 0.09                 | 0.5                  | 0.04      | 0.38       | 0.58        |
| <b>*YLR123C</b>   | <b>*YLR123C</b>   | 0.6              | 0.1                  | 0.3                  | 0.13      | 0.2        | 0.67        |
| <b>YML052W</b>    | <b>SUR7</b>       | 0.39             | 0.18                 | 0.43                 | 0.17      | 0.26       | 0.57        |
| YHR014W           | SPO13             | 0.53             | 0.05                 | 0.42                 | 0.17      | 0.27       | 0.56        |
| <b>YHR002W</b>    | <b>LEU5</b>       | 0.52             | 0.06                 | 0.42                 | 0.07      | 0.24       | 0.69        |
| <b>YLR394W</b>    | <b>CST9</b>       | 0.52             | 0.09                 | 0.39                 | 0.18      | 0.28       | 0.54        |
| <b>YJR060W</b>    | <b>CBF1</b>       | 0.44             | 0.05                 | 0.51                 | 0.13      | 0.54       | 0.33        |
| <b>YCL026C-A</b>  | <b>FRM2</b>       | 0.51             | 0.09                 | 0.4                  | 0.17      | 0.4        | 0.43        |
| <b>YPR015C</b>    | <b>YPR015C</b>    | 0.41             | 0.11                 | 0.48                 | 0.03      | 0.68       | 0.29        |
| <b>YOR286W</b>    | <b>FMP31</b>      | 0.5              | 0.14                 | 0.36                 | 0.03      | 0.09       | 0.88        |
| YGR091W           | PRP31             | 0.34             | 0.16                 | 0.49                 | 0.12      | 0.16       | 0.72        |
| <b>YDL002C</b>    | <b>NHP10</b>      | 0.51             | 0.09                 | 0.4                  | 0.03      | 0.13       | 0.83        |
| <b>*YJL077W-A</b> | <b>*YJL077W-A</b> | 0.55             | 0.06                 | 0.39                 | 0.03      | 0.21       | 0.76        |
| <b>YML007W</b>    | <b>YAP1</b>       | 0.35             | 0.17                 | 0.48                 | 0.11      | 0.36       | 0.53        |
| <b>YER145C</b>    | <b>FTR1</b>       | 0.48             | 0.13                 | 0.39                 | 0.05      | 0.09       | 0.86        |
| <b>YLR149C</b>    | <b>YLR149C</b>    | 0.61             | 0.1                  | 0.29                 | 0.04      | 0.25       | 0.71        |
| <b>YJL012C</b>    | <b>VTC4</b>       | 0.5              | 0.06                 | 0.44                 | 0.09      | 0.11       | 0.8         |
| <b>YLR341W</b>    | <b>SPO77</b>      | 0.49             | 0.07                 | 0.44                 | 0.07      | 0.27       | 0.66        |
| YNL188W           | KAR1              | 0.54             | 0.02                 | 0.43                 | 0.1       | 0.12       | 0.79        |
| YOR195W           | SLK19             | 0.45             | 0.08                 | 0.47                 | 0.03      | 0.39       | 0.58        |
| YGR109C           | CLB6              | 0.44             | 0.17                 | 0.39                 | 0.08      | 0.35       | 0.58        |
| YBR211C           | AME1              | 0.49             | 0.1                  | 0.41                 | 0.05      | 0.3        | 0.65        |
| <b>YDR245W</b>    | <b>MNN10</b>      | 0.44             | 0.11                 | 0.45                 | 0         | 0.16       | 0.84        |
| <b>YDR033W</b>    | <b>MRH1</b>       | 0.4              | 0.18                 | 0.42                 | 0.03      | 0.13       | 0.84        |

|           |           |                     |      |      |      |      |      |
|-----------|-----------|---------------------|------|------|------|------|------|
| YJL030W   | MAD2      | 0.54                | 0.1  | 0.36 | 0.02 | 0.14 | 0.84 |
| YDR091C   | RLI1      | 0.41                | 0.06 | 0.53 | 0.04 | 0.34 | 0.62 |
| YIR001C   | SGN1      | 0.32                | 0.08 | 0.6  | 0.06 | 0.29 | 0.64 |
| YKL078W   | DHR2      | 0.45                | 0.11 | 0.43 | 0.02 | 0.22 | 0.76 |
| YPR190C   | RPC82     | 0.51                | 0.14 | 0.35 | 0.02 | 0.59 | 0.39 |
| YDR266C   | YDR266C   | 0.45                | 0.07 | 0.48 | 0.04 | 0.25 | 0.71 |
| YDL214C   | PRR2      | 0.5                 | 0.09 | 0.42 | 0.08 | 0.15 | 0.78 |
| YDR001C   | NTH1      | 0.44                | 0.1  | 0.45 | 0.05 | 0.61 | 0.33 |
| YIR016W   | YIR016W   | 0.41                | 0.08 | 0.51 | 0    | 0.23 | 0.77 |
| YBR083W   | TEC1      | 0.29                | 0.22 | 0.49 | 0.02 | 0.19 | 0.79 |
| YKR067W   | GPT2      | 0.54                | 0.15 | 0.31 | 0.07 | 0.18 | 0.75 |
| YHR131C   | YHR131C   | 0.53                | 0.08 | 0.39 | 0.17 | 0.13 | 0.71 |
| YFL022C   | FRS2      | 0.46                | 0.1  | 0.44 | 0.07 | 0.23 | 0.7  |
| YDR143C   | SAN1      | 0.4                 | 0.1  | 0.5  | 0.12 | 0.18 | 0.71 |
| YPL174C   | NIP100    | 0.26                | 0.05 | 0.69 | 0.25 | 0.59 | 0.16 |
| YOR002W   | ALG6      | 0.45                | 0.11 | 0.44 | 0.11 | 0.21 | 0.68 |
| YNL283C   | WSC2      | 0.35                | 0.17 | 0.49 | 0.13 | 0.13 | 0.73 |
| YPL247C   | YPL247C   | 0.39                | 0.11 | 0.49 | 0.16 | 0.27 | 0.58 |
| YJL031C   | BET4      | 0.45                | 0.18 | 0.37 | 0.11 | 0.36 | 0.52 |
| YPR119W   | CLB2      | 0.34                | 0.09 | 0.56 | 0.08 | 0.45 | 0.47 |
| YML053C   | YML053C   | 0.56                | 0.14 | 0.3  | 0.09 | 0.11 | 0.81 |
| YJL106W   | IME2      | 0.41                | 0.13 | 0.46 | 0.1  | 0.04 | 0.86 |
| YMR199W   | CLN1      | Pseudohyphal growth |      |      |      |      |      |
| YML016C   | PPZ1      | 0.29                | 0.03 | 0.67 | 0.11 | 0.68 | 0.21 |
| YLR189C   | ATG26     | 0.38                | 0.11 | 0.51 | 0.04 | 0.14 | 0.82 |
| YER007W   | PAC2      | 0.39                | 0.12 | 0.49 | 0.2  | 0.42 | 0.38 |
| YEL022W   | GEA2      | 0.41                | 0.05 | 0.54 | 0.29 | 0.35 | 0.36 |
| YDL192W   | ARF1      | 0.36                | 0.12 | 0.52 | 0.05 | 0.12 | 0.83 |
| YDR335W   | MSN5      | 0.41                | 0.13 | 0.45 | 0.02 | 0.18 | 0.8  |
| YKR029C   | SET3      | 0.33                | 0.06 | 0.62 | 0.07 | 0.22 | 0.72 |
| YGR094W   | VAS1      | 0.49                | 0.12 | 0.39 | 0.07 | 0.17 | 0.76 |
| YBL031W   | SHE1      | 0.37                | 0.14 | 0.49 | 0.1  | 0.47 | 0.43 |
| YGR005C   | TFG2      | 0.51                | 0.07 | 0.42 | 0.12 | 0.18 | 0.71 |
| YGR109W-A | YGR109W-A | 0.36                | 0.17 | 0.48 | 0.11 | 0.18 | 0.71 |
| YPL116W   | HOS3      | 0.29                | 0.06 | 0.65 | 0.19 | 0.19 | 0.61 |
| YAR007C   | RFA1      | 0.13                | 0.04 | 0.82 | 0.2  | 0.73 | 0.06 |
| YDL093W   | PMT5      | 0.42                | 0.12 | 0.46 | 0.1  | 0.21 | 0.69 |
| YOL063C   | CRT10     | 0.47                | 0.11 | 0.42 | 0.11 | 0.17 | 0.71 |
| YJR125C   | ENT3      | 0.36                | 0.12 | 0.53 | 0.05 | 0.36 | 0.59 |
| YIL036W   | CST6      | 0.34                | 0.15 | 0.51 | 0.07 | 0.18 | 0.76 |
| YOR337W   | TEA1      | 0.26                | 0.08 | 0.66 | 0.12 | 0.46 | 0.42 |
| YOR007C   | SGT2      | 0.54                | 0.13 | 0.33 | 0    | 0.22 | 0.78 |
| YJL128C   | PBS2      | 0.42                | 0.13 | 0.44 | 0.09 | 0.18 | 0.73 |
| YIL158W   | YIL158W   | 0.36                | 0.1  | 0.54 | 0.16 | 0.25 | 0.59 |
| YHR177W   | YHR177W   | 0.42                | 0.16 | 0.43 | 0.02 | 0.23 | 0.74 |
| YGL066W   | SGF73     | 0.42                | 0.12 | 0.45 | 0.11 | 0.22 | 0.67 |

|                |               |      |      |      |      |      |      |
|----------------|---------------|------|------|------|------|------|------|
| <b>YMR068W</b> | <b>AVO2</b>   | 0.43 | 0.09 | 0.49 | 0.13 | 0.55 | 0.32 |
| <b>YER131W</b> | <b>RPS26B</b> | 0.52 | 0.12 | 0.36 | 0.04 | 0.06 | 0.89 |
| YFL037W        | TUB2          | 0.24 | 0.04 | 0.72 | 0.47 | 0.34 | 0.19 |
| YDL155W        | CLB3          | 0.28 | 0.06 | 0.66 | 0.25 | 0.29 | 0.46 |
| YPR120C        | CLB5          | 0.3  | 0.09 | 0.62 | 0.21 | 0.31 | 0.49 |
| YFL039C        | ACT1          | 0.27 | 0.1  | 0.63 | 0.53 | 0.27 | 0.2  |
| Empty vector   | Empty vector  | 0.57 | 0.15 | 0.28 | 0.11 | 0.26 | 0.6  |
