# Supplementary material for: Mechanisms of Cell Cycle Control Revealed by a Systematic and Quantitative Overexpression Screen in S. cerevisiae
Source: PubMed Central journal article supplement (PMC2438615; doi:10.1371/journal.pgen.1000120), 2008-07-11
Supplement: pgen.1000120.s006.pdf [file pgen.1000120.s006.pdf]

**Supplemental Table 2: Summary of 108 strains with cell cycle defects.**

\* Genes in G1 category.

| 21 essential genes | 26 known cdc genes | 17 transcription factors | 24 uncharacterized ORFs | 48 others |
|--------------------|--------------------|--------------------------|-------------------------|-----------|
| *NCB2              | *SHY1              | *SKO1                    | *YLL066W-B              | *HHO1     |
| *TRM5              | *TRM5              | *GAT4                    | *YOR131C                | *BUL1     |
| ASK1               | ASK1               | *NCB2                    | *YPR152C                | *GOS1     |
| CDC31              | CDC31              | *MIG3                    | *TMA64                  | *RPL14B   |
| CDC39              | CDC39              | TEA1                     | *YDR493W                | *RPA14    |
| SPC97              | SPC97              | TFG2                     | YGR206W                 | *ENO2     |
| SEC17              | SEC17              | CDC39                    | YML053C                 | *ARC1     |
| MYO2               | MYO2               | CST6                     | YPR015C                 | *CYT1     |
| PRP31              | SPO13              | YPR015C                  | YHR131C                 | *IES3     |
| KAR1               | CLN1               | CBF1                     | YLR123C                 | *IMG1     |
| AME1               | PRP31              | TEC1                     | FRM2                    | RFA1      |
| RLI1               | KAR1               | CRT10                    | YIL158W                 | HOS3      |
| DHR2               | SLK19              | YDR266C                  | YHR177W                 | MRH1      |
| RPC82              | CLB6               | YGR109W-A                | YDR266C                 | SGN1      |
| FRS2               | AME1               | MTH1                     | YGR109W-A               | IME2      |
| BET4               | MAD2               | YAP1                     | YIR016W                 | MNN10     |
| VAS1               | NIP100             | SGF73                    | YLR149C                 | BET4      |
| TFG2               | CLB2               |                          | FMP31                   | NTH1      |
| RFA1               | CLB5               |                          | YPL247C                 | GEA2      |
| TUB2               | PAC2               |                          | YBR131C-A               | GPT2      |
| ACT1               | ARF1               |                          | SHE1                    | RPS26B    |
|                    | SHE1               |                          | YJL077W-A               | SPC2      |
|                    | TFG2               |                          | FMP31                   | SPO77     |
|                    | CLB3               |                          | YDL159W-A               | LEU5      |
|                    | TUB2               |                          |                         | TPM2      |
|                    | ACT1               |                          |                         | FRS2      |
|                    | ASK1               |                          |                         | RPC82     |
|                    | CDC31              |                          |                         | PMT5      |
|                    |                    |                          |                         | VTC4      |
|                    |                    |                          |                         | ALG6      |
|                    |                    |                          |                         | SGT2      |
|                    |                    |                          |                         | SET3      |
|                    |                    |                          |                         | VAS1      |
|                    |                    |                          |                         | SAN1      |
|                    |                    |                          |                         | AVO2      |
|                    |                    |                          |                         | ATG26     |
|                    |                    |                          |                         | ENT3      |
|                    |                    |                          |                         | SEC17     |
|                    |                    |                          |                         | PRR2      |
|                    |                    |                          |                         | FTR1      |
|                    |                    |                          |                         | NHP10     |
|                    |                    |                          |                         | PBS2      |
|                    |                    |                          |                         | WSC2      |

|  |  |  |  |       |
|--|--|--|--|-------|
|  |  |  |  | MSN5  |
|  |  |  |  | PDR17 |
|  |  |  |  | CST9  |
|  |  |  |  | SUR7  |
|  |  |  |  | DHR2  |
