# Supplementary material for: Mechanisms of Cell Cycle Control Revealed by a Systematic and Quantitative Overexpression Screen in S. cerevisiae
Source: PubMed Central journal article supplement (PMC2438615; doi:10.1371/journal.pgen.1000120), 2008-07-11
Supplement: pgen.1000120.s007.pdf [file pgen.1000120.s007.pdf]

**Supplemental Table 3: Comparison between over-expression and loss-of-function phenotypes**

Genes in G1 category

| Overexpression only | Overexpression $\cap$ SCMD | Genes not included in SCMD |
|---------------------|----------------------------|----------------------------|
| BUL1                | YDR493W                    | TRM5                       |
| SKO1                |                            | NCB2                       |
| YOR131C             |                            |                            |
| ARC1                |                            |                            |
| CYT1                |                            |                            |
| IES3                |                            |                            |
| TMA64               |                            |                            |
| GOS1                |                            |                            |
| RPA14               |                            |                            |

Genes in G2 category

| Overexpression only | Overexpression $\cap$ SCMD | Genes not included in SCMD |
|---------------------|----------------------------|----------------------------|
| NIP100              | PDR17                      | TUB2                       |
| PPZ1                | MNN10                      | ACT1                       |
| TEA1                | ARF1                       | SPC97                      |
| CLB3                |                            | CDC39                      |
| HOS3                |                            | GEA2                       |
| SET3                |                            | RLI1                       |
| CLB5                |                            | PRP31                      |
| SGN1                |                            | YGR109W-A                  |
| CLB2                |                            | VTC4                       |
| YIL158W             |                            | RFA1                       |
| ENT3                |                            |                            |
|                     |                            |                            |
| YIR016W             |                            |                            |
| CST6                |                            |                            |
| CBF1                |                            |                            |
| ATG26               |                            |                            |
| SAN1                |                            |                            |
| MTH1                |                            |                            |
| TEC1                |                            |                            |
| YPL247C             |                            |                            |
| SHE1                |                            |                            |
| PAC2                |                            |                            |
| AVO2                |                            |                            |
| WSC2                |                            |                            |
| YAP1                |                            |                            |
| YPR015C             |                            |                            |
| YDR266C             |                            |                            |
| SLK19               |                            |                            |

|       |  |  |
|-------|--|--|
| IME2  |  |  |
| PMT5  |  |  |
| MSN5  |  |  |
| NTH1  |  |  |
| SGF73 |  |  |
| ALG6  |  |  |
| PBS2  |  |  |
