# Supplementary material for: Mechanisms of Cell Cycle Control Revealed by a Systematic and Quantitative Overexpression Screen in S. cerevisiae
Source: PubMed Central journal article supplement (PMC2438615; doi:10.1371/journal.pgen.1000120), 2008-07-11
Supplement: pgen.1000120.s008.pdf [file pgen.1000120.s008.pdf]

**Supplemental Table 4: Genes whose overexpression induces slow growth, drug sensitivity.** 77 new genes leading to cell cycle defects upon overexpression and 3 positive controls were tested for slow growth phenotypes and sensitivity to nocodazole (NOC: 15µg/ml) and hydroxyurea (HU: 50µM).

Genes in the G1 category:

| SC_GAL  | No slow growth on SC_GAL | SC_GAL_NOC | SC_GAL_HU | NOC and HU |
|---------|--------------------------|------------|-----------|------------|
| IES3    | IMG1                     | YDR493W    | YOR131C   | MIG3       |
| YOR131C |                          |            | YPR152C   | GAT4       |
| RPL14B  |                          |            | GOS1      |            |
| MIG3    |                          |            |           |            |
| ENO2    |                          |            |           |            |
| TMA64   |                          |            |           |            |
| RPA14   |                          |            |           |            |
| YDR493W |                          |            |           |            |
| CYT1    |                          |            |           |            |
| YPR152C |                          |            |           |            |
| NCB2    |                          |            |           |            |
| GAT4    |                          |            |           |            |
| GOS1    |                          |            |           |            |
| HHO1    |                          |            |           |            |
| SKO1    |                          |            |           |            |
| BUL1    |                          |            |           |            |
| ARC1    |                          |            |           |            |
|         |                          |            |           |            |
|         |                          |            |           |            |

Gene in the G2/M category:

| SC_GAL  | No slow growth on SC_GAL | SC_GAL_NOC | SC_GAL_HU | Resistant to HU | NOC and HU |
|---------|--------------------------|------------|-----------|-----------------|------------|
| YGR206W | DHR2                     | YML053C    | LEU5      | FRM2            | YHR131C    |
| SPC2    | GPT2                     | YPR015C    | WSC2      | YIR016W         | YPL247C    |
| TPM2    | YGR109W-A                | YLR149C    | SGF73     | PMT5            | RFA1       |
| PDR17   |                          | MRH1       |           | FTR1            | MNN10      |
| MTH1    |                          | HOS3       |           |                 | BET4       |
| SUR7    |                          | SGN1       |           |                 | VTC4       |
| LEU5    |                          | IME2       |           |                 | SET3       |
| CST9    |                          | YDR266C    |           |                 | SGT2       |
| CBF1    |                          | GEA2       |           |                 | ALG6       |
| FRM2    |                          | SPO77      |           |                 | CST9       |
| YPR015C |                          | RLI1       |           |                 | SUR7       |
| FMP31   |                          | VAS1       |           |                 |            |
| NHP10   |                          | AVO2       |           |                 |            |
| YAP1    |                          | ATG26      |           |                 |            |
| FTR1    |                          | FMP31      |           |                 |            |
| YLR149C |                          | FTR1       |           |                 |            |

|         |  |       |  |  |  |
|---------|--|-------|--|--|--|
| VTC4    |  | PBS2  |  |  |  |
| SPO77   |  | PDR17 |  |  |  |
| MNN10   |  | TEA1  |  |  |  |
| MRH1    |  | CBF1  |  |  |  |
| RLI1    |  | MTH1  |  |  |  |
| SGN1    |  |       |  |  |  |
| RPC82   |  |       |  |  |  |
| YDR266C |  |       |  |  |  |
| PRR2    |  |       |  |  |  |
| NTH1    |  |       |  |  |  |
| YIR016W |  |       |  |  |  |
| TEC1    |  |       |  |  |  |
| YHR131C |  |       |  |  |  |
| FRS2    |  |       |  |  |  |
| SAN1    |  |       |  |  |  |
| ALG6    |  |       |  |  |  |
| WSC2    |  |       |  |  |  |
| YPL247C |  |       |  |  |  |
| BET4    |  |       |  |  |  |
| YML053C |  |       |  |  |  |
| IME2    |  |       |  |  |  |
| ATG26   |  |       |  |  |  |
| GEA2    |  |       |  |  |  |
| MSN5    |  |       |  |  |  |
| SET3    |  |       |  |  |  |
| VAS1    |  |       |  |  |  |
| HOS3    |  |       |  |  |  |
| RFA1    |  |       |  |  |  |
| PMT5    |  |       |  |  |  |
| CRT10   |  |       |  |  |  |
| ENT3    |  |       |  |  |  |
| CST6    |  |       |  |  |  |
| TEA1    |  |       |  |  |  |
| SGT2    |  |       |  |  |  |
| PBS2    |  |       |  |  |  |
| YIL158W |  |       |  |  |  |
| YHR177W |  |       |  |  |  |
| SGF73   |  |       |  |  |  |
| AVO2    |  |       |  |  |  |
| RPS26B  |  |       |  |  |  |
