# Supplementary material for: Mechanisms of Cell Cycle Control Revealed by a Systematic and Quantitative Overexpression Screen in S. cerevisiae
Source: PubMed Central journal article supplement (PMC2438615; doi:10.1371/journal.pgen.1000120), 2008-07-11
Supplement: pgen.1000120.s009.pdf [file pgen.1000120.s009.pdf]

**Supplemental Table 5: Genes upregulated following overexpression of *SKO1*.**

Bold: p-value <0.01. Red bold: p-value <0.01 and involved in the pheromone response pathway.

| Systematic name | Standard name | p-value  |
|-----------------|---------------|----------|
| YIL082W         | YIL082W       | 1.13E-10 |
| YGR109W-A       | YGR109W-A     | 1.58E-10 |
| YILWTY3-1A      | YILWTY3-1A    | 4.12E-10 |
| YIR034C         | LYS1          | 1.42E-09 |
| YILWTY3-1C      | YILWTY3-1C    | 3.33E-09 |
| YHL016C         | DUR3          | 6.00E-09 |
| YCL055W         | <b>KAR4</b>   | 1.14E-08 |
| YGL032C         | <b>AGA2</b>   | 1.62E-08 |
| YNR044W         | <b>AGA1</b>   | 1.78E-08 |
| YDR461W         | <b>MFA1</b>   | 7.70E-08 |
| YHR018C         | ARG4          | 1.68E-07 |
| YHLCSIGMA1      | YHLCSIGMA1    | 3.49E-07 |
| YFL026W         | <b>STE2</b>   | 4.45E-07 |
| YCL018W         | LEU2          | 1.48E-06 |
| YILWTY3-1B      | YILWTY3-1B    | 1.57E-06 |
| YKR093W         | PTR2          | 2.40E-06 |
| YOL058W         | ARG1          | 2.96E-06 |
| YBLCSIGMA1      | YBLCSIGMA1    | 3.21E-06 |
| YOR225W         | YOR225W       | 5.63E-06 |
| YKL035W         | UGP1          | 1.15E-05 |
| YOR226C         | ISU2          | 1.21E-05 |
| YIL015W         | <b>BAR1</b>   | 1.23E-05 |
| YBR256C         | RIB5          | 1.28E-05 |
| YDR171W         | HSP42         | 1.32E-05 |
| YGL184C         | STR3          | 2.55E-05 |
| YIL082W-A       | YIL082W-A     | 4.58E-05 |
| YJR152W         | DAL5          | 7.45E-05 |
| YBR104W         | YMC2          | 8.03E-05 |
| YDR309C         | <b>GIC2</b>   | 9.58E-05 |
| YPL092W         | SSU1          | 0.000106 |
| YMR058W         | FET3          | 0.000115 |
| YCL027W         | <b>FUS1</b>   | 0.000135 |
| YEL065W         | SIT1          | 0.000139 |
| YMR136W         | GAT2          | 0.000142 |
| YIL114C         | POR2          | 0.000231 |

|            |            |          |
|------------|------------|----------|
| YER069W    | ARG5,6     | 0.000267 |
| YILWTY3-1D | YILWTY3-1D | 0.000276 |
| YDR158W    | HOM2       | 0.000287 |
| YIL117C    | PRM5       | 0.000294 |
| YBR043C    | QDR3       | 0.00031  |
| YCL030C    | HIS4       | 0.000335 |
| YPL156C    | PRM4       | 0.000385 |
| YOR383C    | FIT3       | 0.000457 |
| YGL053W    | PRM8       | 0.000488 |
| YPL250C    | ICY2       | 0.000543 |
| YKR039W    | GAP1       | 0.000623 |
| YGR065C    | VHT1       | 0.000664 |
| YJR153W    | PGU1       | 0.000806 |
| YBR169C    | SSE2       | 0.000891 |
| YKR069W    | MET1       | 0.001082 |
| YDR043C    | NRG1       | 0.001268 |
| YGR019W    | UGA1       | 0.001366 |
| YGL009C    | LEU1       | 0.001488 |
| YPL265W    | DIP5       | 0.001536 |
| YIR032C    | DAL3       | 0.001597 |
| YBR092C    | PHO3       | 0.001618 |
| YDL170W    | UGA3       | 0.001818 |
| YKL120W    | OAC1       | 0.001843 |
| YHR208W    | BAT1       | 0.003597 |
| YBR040W    | FIG1       | 0.003645 |
| YOR203W    | YOR203W    | 0.003689 |
| YBR156C    | SLI15      | 0.004268 |
| YHR180W    | YHR180W    | 0.004604 |
| YGL096W    | TOS8       | 0.004978 |
| YLL026W    | HSP104     | 0.005045 |
| YKL062W    | MSN4       | 0.005224 |
| YJR150C    | DAN1       | 0.005236 |
| YDL198C    | GGC1       | 0.005669 |
| YFL047W    | RGD2       | 0.005681 |
| YIL108W    | YIL108W    | 0.00576  |
| YCR089W    | FIG2       | 0.006272 |
| YDR533C    | HSP31      | 0.006641 |
| YOR202W    | HIS3       | 0.011976 |
| YMR096W    | SNZ1       | 0.016113 |
| YGR142W    | BTN2       | 0.018001 |
| YFR030W    | MET10      | 0.021845 |
| YKL178C    | STE3       | 0.029495 |
| YPL276W    | YPL276W    | 0.029906 |
| YGR109W-B  | YGR109W-B  | 0.031031 |

|            |            |          |
|------------|------------|----------|
| YLR237W    | THI7       | 0.034019 |
| YJL170C    | ASG7       | 0.038652 |
| YNL167C    | SKO1       | 0.04157  |
| YKL211C    | TRP3       | 0.047914 |
| YHR126C    | YHR126C    | 0.054046 |
| YPL278C    | YPL278C    | 0.069839 |
| YKR034W    | DAL80      | 0.070488 |
| YBL086C    | YBL086C    | 0.102797 |
| YIL080W    | YIL080W    | 0.131767 |
| YHL036W    | MUP3       | 0.141744 |
| YOL119C    | MCH4       | 0.144385 |
| YOR193W    | PEX27      | 0.169166 |
| YNL065W    | AQR1       | 0.183735 |
| YBR214W    | SDS24      | 0.188756 |
| YIL120W    | QDR1       | 0.188829 |
| YNL142W    | MEP2       | 0.207984 |
| YDL085W    | NDE2       | 0.219352 |
| YIL164C    | NIT1       | 0.244444 |
| YLR267W    | BOP2       | 0.326351 |
| YNL042W    | BOP3       | 0.328169 |
| YGR055W    | MUP1       | 0.329911 |
| YML116W    | ATR1       | 0.374456 |
| YML128C    | MSC1       | 0.406651 |
| YLR307W    | CDA1       | 0.429131 |
| YDR442W    | YDR442W    | 0.433514 |
| YKR105C    | YKR105C    | 0.444108 |
| YMR182C    | RGM1       | 0.45413  |
| YGL164C    | YRB30      | 0.455562 |
| YIL160C    | POT1       | 0.464897 |
| YNL279W    | PRM1       | 0.468232 |
| YMR120C    | ADE17      | 0.471552 |
| YFL053W    | DAK2       | 0.498348 |
| YLR266C    | PDR8       | 0.505084 |
| YML047C    | PRM6       | 0.506647 |
| YMR232W    | FUS2       | 0.523272 |
| YLR178C    | TFS1       | 0.528707 |
| YJR004C    | SAG1       | 0.540445 |
| YPL280W    | HSP32      | 0.554166 |
| YGLCDELTA5 | YGLCDELTA5 | 0.569083 |
| YMR322C    | SNO4       | 0.610928 |
| YPR136C    | #N/A       | 0.624643 |
| YMR095C    | SNO1       | 0.627073 |
| YFL055W    | AGP3       | 0.630934 |
| YGL181W    | GTS1       | 0.631746 |

|           |            |          |
|-----------|------------|----------|
| YNR067C   | DSE4       | 0.631772 |
| YIL113W   | SDP1       | 0.649168 |
| YBR147W   | YBR147W    | 0.653764 |
| YER185W   | YER185W    | 0.664736 |
| YOL158C   | ENB1       | 0.664814 |
| YML048W-A | YML048W-A  | 0.707211 |
| YPL187W   | MF(ALPHA)1 | 0.712439 |
| YOR011W   | AUS1       | 0.737899 |
| YHL044W   | YHL044W    | 0.770039 |
| YMR057C   | YMR057C    | 0.789247 |
| YPR160W   | GPH1       | 0.792923 |
| YIR017C   | MET28      | 0.838734 |
| YIR013C   | GAT4       | 0.841098 |
| YBL075C   | SSA3       | 0.858576 |
| YHR084W   | STE12      | 0.872093 |
| YNL229C   | URE2       | 0.872634 |
| YMR173W-A | YMR173W-A  | 0.888746 |
| YKL177W   | YKL177W    | 0.916374 |
| YDL245C   | HXT15      | 0.922828 |
| YLR452C   | SST2       | 0.957528 |
| YOR389W   | YOR389W    | 0.962837 |
| YIL037C   | PRM2       | 0.982168 |
| RDN18-1A  | RDN18-1A   | 0.990424 |
| YJR154W   | YJR154W    | 1.006351 |
| YPR159W   | KRE6       | 1.026654 |
| YOR106W   | VAM3       | 1.054805 |
| YHR168W   | MTG2       | 1.066644 |
| YMR198W   | CIK1       | 1.081809 |
| YFR023W   | PES4       | 1.089436 |
| YNL165W   | YNL165W    | 1.102544 |
| YNR069C   | BSC5       | 1.114832 |
| YOL055C   | THI20      | 1.120593 |
| YNR064C   | YNR064C    | 1.126487 |
| YMR065W   | KAR5       | 1.137217 |
| YLL028W   | TPO1       | 1.140447 |
| YJL203W   | PRP21      | 1.141816 |
| YDR273W   | DON1       | 1.16255  |
| REP2      | REP2       | 1.163069 |
| YNL123W   | NMA111     | 1.164211 |
| YPR153W   | YPR153W    | 1.167228 |
| RDN5-1    | RDN5-1     | 1.219257 |
| YGL033W   | HOP2       | 1.224666 |
| YER060W-A | FCY22      | 1.230945 |
| YJL108C   | PRM10      | 1.249204 |

|            |            |          |
|------------|------------|----------|
| YOR329C    | SCD5       | 1.26001  |
| YHRCDELTA4 | YHRCDELTA4 | 1.263241 |
| YPL017C    | IRC15      | 1.327718 |
| YLR218C    | YLR218C    | 1.32931  |
| SNR70      | SNR70      | 1.338083 |
| YGL214W    | YGL214W    | 1.371733 |
| YNL231C    | PDR16      | 1.435346 |
| YMR089C    | YTA12      | 1.439261 |
| YNL127W    | FAR11      | 1.454467 |
| YER188W    | YER188W    | 1.564968 |
