# Supplementary material for: Mechanisms of Cell Cycle Control Revealed by a Systematic and Quantitative Overexpression Screen in S. cerevisiae
Source: PubMed Central journal article supplement (PMC2438615; doi:10.1371/journal.pgen.1000120), 2008-07-11
Supplement: pgen.1000120.s010.pdf [file pgen.1000120.s010.pdf]

**Supplemental Table 6: Over-expression strains appearing diploid or 3C.** These strains failed to show Gal-dependence on the phenotype and were omitted from further analysis.

| Diploid category |               | 3C category     |               |
|------------------|---------------|-----------------|---------------|
| Systematic name  | Standard name | Systematic name | Standard name |
| YGR174C          | CBP4          | YGR120C         | COG2          |
| YKL176C          | LST4          | YEL017C-A       | PMP2          |
| YNL061W          | NOP2          | YBR179C         | FZO1          |
| YBR103W          | SIF2          | YKR044W         | UIP5          |
| YAR003W          | SWD1          | YNL131W         | TOM22         |
| YGR013W          | SNU71         | YLR126C         | YLR126C       |
| YHR149C          | SKG6          | YJL050W         | MTR4          |
| YOR348C          | PUT4          | YMR313C         | TGL3          |
| YKL047W          | YKL047W       | YCL063W         | VAC17         |
| YLR336C          | SGD1          | YKL160W         | ELF1          |
| YLL003W          | SFI1          | YNL114C         | YNL114C       |
| YKL163W          | PIR3          | YNR074C         | AIF1          |
| YEL060C          | PRB1          | YOL072W         | THP1          |
| YNL097C          | PHO23         | YLR139C         | SLS1          |
| YFR037C          | RSC8          | YBR239C         | YBR239C       |
| YGL023C          | PIB2          | YHR169W         | DBP8          |
| YGR051C          | YGR051C       | YLR062C         | YLR062C       |
| Q0250            | COX2          | YGL062W         | PYC1          |
| YBL026W          | LSM2          | YPR051W         | MAK3          |
| YMR117C          | SPC24         | YJR147W         | HMS2          |
| YLR148W          | PEP3          | YOR161C-A       | YOR161C-A     |
| YML047C          | PRM6          | YLR275W         | SMD2          |
| YML047C          | PRM6          | YER074W-A       | YOS1          |
| YJR017C          | ESS1          | YPL002C         | SNF8          |
| YPL161C          | BEM4          | YER186C         | YER186C       |
| YGR122C-A        | YGR122C-A     | YDR339C         | FCF1          |
| YLR365W          | YLR365W       | YNL109W         | YNL109W       |
| YKR060W          | UTP30         | YBR258C         | SHG1          |
| YGR106C          | YGR106C       | YGL242C         | YGL242C       |
| YJR097W          | JJJ3          | YNL190W         | YNL190W       |
| YDR540C          | YDR540C       | YJR107W         | YJR107W       |
| YLR068W          | FYV7          | YKL162C         | YKL162C       |
| YMR267W          | PPA2          | YHR098C         | SFB3          |

|           |           |         |         |
|-----------|-----------|---------|---------|
| YBR087W   | RFC5      | YNL059C | ARP5    |
| YDR363W-A | SEM1      | YEL045C | YEL045C |
| YPL152W   | RRD2      | YDR006C | SOK1    |
| YER037W   | PHM8      | YJL194W | CDC6    |
| YDL114W-A | YDL114W-A | YLL050C | COF1    |
| YDR149C   | YDR149C   | YMR302C | PRP12   |
| YER185W   | YER185W   | YPL248C | GAL4    |
| YGL101W   | YGL101W   | YCR067C | SED4    |
| YBR283C   | SSH1      | YEL052W | AFG1    |
| YMR270C   | RRN9      | YMR243C | ZRC1    |
| YCR009C   | RVS161    | YML054C | CYB2    |
| YNL180C   | RHO5      | YPR193C | HPA2    |
| YGR104C   | SRB5      | YMR149W | SWP1    |
| YLR421C   | RPN13     | YBR234C | ARC40   |
| YGR213C   | RTA1      | YPL206C | YPL206C |
| YPR009W   | SUT2      | YNL134C | YNL134C |
| YNL213C   | YNL213C   | YMR193W | MRPL24  |
| YOL048C   | YOL048C   |         |         |
| YOR295W   | UAF30     |         |         |
| YML001W   | YPT7      |         |         |
| YNL159C   | ASI2      |         |         |
| YAR030C   | YAR030C   |         |         |
| YPL045W   | VPS16     |         |         |
| YER098W   | UBP9      |         |         |
| YDR058C   | TGL2      |         |         |
| YBR143C   | SUP45     |         |         |
| YDR222W   | YDR222W   |         |         |
| YKR014C   | YPT52     |         |         |
| YGR267C   | FOL2      |         |         |
| YDR045C   | RPC11     |         |         |
| YLR424W   | NTR1      |         |         |
| YKL135C   | APL2      |         |         |
| YDL100C   | GET3      |         |         |
| YFL030C-A | YFL030C-A |         |         |
| YEL001C   | YEL001C   |         |         |
| YGL052W   | YGL052W   |         |         |
| YDR454C   | GUK1      |         |         |
| YGL090W   | LIF1      |         |         |
| YPL244C   | HUT1      |         |         |
| YCR044C   | PER1      |         |         |
| YLR441C   | RPS1A     |         |         |
| YIL118W   | RHO3      |         |         |
| YNL097C-B | YNL097C-B |         |         |

|           |           |  |  |
|-----------|-----------|--|--|
| YDL243C   | AAD4      |  |  |
| YDR177W   | UBC1      |  |  |
| YNL056W   | YNL056W   |  |  |
| YOR189W   | IES4      |  |  |
| YNL099C   | OCA1      |  |  |
| YPL044C   | YPL044C   |  |  |
| YPL103C   | FMP30     |  |  |
| YNL165W   | YNL165W   |  |  |
| YHR058C   | MED6      |  |  |
| YMR286W   | MRPL33    |  |  |
| YNL030W   | HHF2      |  |  |
| YNL215W   | IES2      |  |  |
| YLR320W   | MMS22     |  |  |
| YJR136C   | YJR136C   |  |  |
| YML007C-A | YML007C-A |  |  |
| YHL045W   | YHL045W   |  |  |
| YJR071W   | YJR071W   |  |  |
| YML071C   | COG8      |  |  |
| YFL065C   | YFL065C   |  |  |
| YMR274C   | RCE1      |  |  |
| YDL071C   | YDL071C   |  |  |
| YCR023C   | YCR023C   |  |  |
| YIL173W   | VTH1      |  |  |
| YMR214W   | SCJ1      |  |  |
| YKR050W   | TRK2      |  |  |
| YHR060W   | VMA22     |  |  |
| YPL250C   | ICY2      |  |  |
| YNR046W   | TRM112    |  |  |
| YPR055W   | SEC8      |  |  |
| YPR055W   | SEC8      |  |  |
| YDR303C   | RSC3      |  |  |
| YPR070W   | MED1      |  |  |
| YPR070W   | MED1      |  |  |
| YDL145C   | COP1      |  |  |
| tORF6     | tORF6     |  |  |
| YOR113W   | AZF1      |  |  |
| YCL064C   | CHA1      |  |  |
| YOL007C   | YOL007C   |  |  |
| YGL038C   | OCH1      |  |  |
| YBL089W   | AVT5      |  |  |
| YPR106W   | ISR1      |  |  |
| YHR198C   | FMP22     |  |  |
| YLR301W   | YLR301W   |  |  |

|           |         |  |  |
|-----------|---------|--|--|
| YJL192C   | SOP4    |  |  |
| YDR514C   | YDR514C |  |  |
| YGL104C   | VPS73   |  |  |
| YGL014W   | PUF4    |  |  |
| YNL040W   | YNL040W |  |  |
| YEL012W   | UBC8    |  |  |
| YLR005W   | SSL1    |  |  |
| YGR251W   | YGR251W |  |  |
| YLR400W   | YLR400W |  |  |
| YMR090W   | YMR090W |  |  |
| YNL158W   | PGA1    |  |  |
| YOR314W   | YOR314W |  |  |
| YMR120C   | ADE17   |  |  |
| YDR441C   | APT2    |  |  |
| YPR130C   | YPR130C |  |  |
| YPR084W   | YPR084W |  |  |
| YPR133C   | SPN1    |  |  |
| YBR162W-A | YSY6    |  |  |
| YNL150W   | YNL150W |  |  |
| YPR099C   | YPR099C |  |  |
| YNL152W   | YNL152W |  |  |
| YOL032W   | OPI10   |  |  |
| YOL032W   | OPI10   |  |  |
| YPL041C   | YPL041C |  |  |
| YDR368W   | YPR1    |  |  |
| YGL253W   | HXK2    |  |  |
| YDR309C   | GIC2    |  |  |
| YBR020W   | GAL1    |  |  |
| YHR094C   | HXT1    |  |  |
| YNL031C   | HHT2    |  |  |
| YNL103W   | MET4    |  |  |
| YJR069C   | HAM1    |  |  |
| YBR248C   | HIS7    |  |  |
| YOR142W   | LSC1    |  |  |
| YER091C   | MET6    |  |  |
| YBR015C   | MNN2    |  |  |
| YGL077C   | HNM1    |  |  |
| YNR072W   | HXT17   |  |  |
| YPR159W   | KRE6    |  |  |
| YLR332W   | MID2    |  |  |
| YMR172W   | HOT1    |  |  |
| YMR172W   | HOT1    |  |  |
| YBL003C   | HTA2    |  |  |

|           |         |  |  |
|-----------|---------|--|--|
| YKL190W   | CNB1    |  |  |
| YDL126C   | CDC48   |  |  |
| YER029C   | SMB1    |  |  |
| YER072W   | VTC1    |  |  |
| YFL017W-A | SMX2    |  |  |
| YGR162W   | TIF4631 |  |  |
| YBR206W   | YBR206W |  |  |
| YBL075C   | SSA3    |  |  |
| YML021C   | UNG1    |  |  |
| YER024W   | YAT2    |  |  |
| YBR280C   | YBR280C |  |  |
| YER005W   | YND1    |  |  |
| YOR324C   | FRT1    |  |  |
| YLR413W   | YLR413W |  |  |
| YMR135C   | GID8    |  |  |
| YOR356W   | YOR356W |  |  |
| YLR414C   | YLR414C |  |  |
| YNL077W   | APJ1    |  |  |
| YLR190W   | MMR1    |  |  |
| YLR077W   | FMP25   |  |  |
| YDR281C   | PHM6    |  |  |
| YJR063W   | RPA12   |  |  |
| YKL059C   | MPE1    |  |  |
| YHR021C   | RPS27B  |  |  |
| YFR026C   | YFR026C |  |  |
| YHR122W   | YHR122W |  |  |
| YGL051W   | MST27   |  |  |
| YJR014W   | TMA22   |  |  |
| YKL169C   | YKL169C |  |  |
| YNL142W   | MEP2    |  |  |
| YLR245C   | CDD1    |  |  |
| YDR047W   | HEM12   |  |  |
| YLR213C   | CRR1    |  |  |
| YBR222C   | PCS60   |  |  |
| YGL181W   | GTS1    |  |  |
| YGR068C   | YGR068C |  |  |
| YER188W   | YER188W |  |  |
| YJL083W   | TAX4    |  |  |
| YIL108W   | YIL108W |  |  |
| YDL033C   | SLM3    |  |  |
| YOR223W   | YOR223W |  |  |
| YKL146W   | AVT3    |  |  |
| YGL166W   | CUP2    |  |  |

|           |           |  |  |
|-----------|-----------|--|--|
| YNL304W   | YPT11     |  |  |
| YIL153W   | RRD1      |  |  |
| YAR035W   | YAT1      |  |  |
| YJL071W   | ARG2      |  |  |
| YNL176C   | YNL176C   |  |  |
| YBR298C-A | YBR298C-A |  |  |
| YOR391C   | HSP33     |  |  |
| YJL156W-A | YJL156W-A |  |  |
| YCL031C   | RRP7      |  |  |
